# Supplementary material for: Development and Validation of Risk Prediction Models for Colorectal Cancer in Patients with Symptoms
Source: MDPI journal article supplement (doi:10.3390/jpm13071065), 2023-06-29
Supplement: s1 [file s1]

## **Supplementary Material**

**Table S1:** CRC SNPs used for the generation of polygenic risk score

**Table S2:** wGRS<sub>137</sub>, wGRS<sub>163</sub>, wGRS<sub>202</sub> comparison

**Table S3:** Risk prediction models for CRC in patients with symptoms

**Table S4:** Comparison of CRC cases in SOCCS (n=1649) and LABSS (n=37)

**Table S5:** Age-CRC restricted cubic splines

**Table S6:** BMI-CRC restricted cubic splines

**Table S7:** wGRS<sub>202</sub>-CRC restricted cubic splines

**Table S8:** Model C and model E comparison

**Table S9:** Summary of models A-D formula

**Table S10:** CRC risk prediction models that incorporated genetic predictors

**Table S11:** Methods for variable selection in the development of the final prediction model

**Table S12:** Random forest model F and model G comparison

**Figure S1:** Flow chart for wGRS<sub>137</sub>, wGRS<sub>163</sub>, wGRS<sub>202</sub>

**Figure S2:** TRIPOD checklist

**Figure S3:** Plot-association between age and risk of CRC

**Figure S4:** Plot-association between BMI and risk of CRC

**Figure S5:** Plot-association between wGRS<sub>202</sub> and risk of CRC

**Figure S6:** Restricted cubic splines fit age with CRC risk

**Figure S7:** Restricted cubic splines fit BMI with CRC risk

**Figure S8:** Restricted cubic splines fit wGRS<sub>202</sub> with CRC risk

**Figure S9:** ROC curves- wGRS<sub>137</sub>, wGRS<sub>163</sub>, wGRS<sub>202</sub> comparison

**Figure S10:** Calibration curves- wGRS<sub>137</sub>, wGRS<sub>163</sub>, wGRS<sub>202</sub> comparison

**Figure S11:** Random forest parameters tuning: mtry versus OOB error

**Figure S12:** Model F\_ Plot of OOB errors against number of trees

**Figure S13:** Model G\_ Plot of OOB errors against number of trees

**Table S1:** CRC SNPs used for the generation of polygenic risk score

| SNP_Ldproxy | Chr | Position  | Allele_A | Allele_B | R <sup>2</sup> | SNP/Ldproxy | Coefficient (beta) extracted from meta-GWAS |
|-------------|-----|-----------|----------|----------|----------------|-------------|---------------------------------------------|
| rs2807367   | 1   | 22503282  | G        | C        | NA             | SNP         | -0.03581                                    |
| rs34963268  | 1   | 22710877  | G        | C        | NA             | SNP         | -0.05861                                    |
| rs28428561  | 1   | 38434306  | G        | A        | 0.8348         | proxy       | 0.053686                                    |
| rs200394259 | 1   | 55268836  | CTTACA   | C        | 0.5333         | proxy       | 0.04143                                     |
| rs7542665   | 1   | 62673037  | T        | C        | NA             | SNP         | 0.002712                                    |
| rs3124454   | 1   | 71040166  | G        | T        | NA             | SNP         | -0.04427                                    |
| rs6660031   | 1   | 110365045 | G        | A        | NA             | SNP         | 0.029928                                    |
| rs5028523   | 1   | 172864224 | A        | G        | NA             | SNP         | -0.04043                                    |
| rs10911251  | 1   | 183081194 | A        | C        | 0.9352         | proxy       | -0.0728                                     |
| rs12137232  | 1   | 201885446 | G        | T        | NA             | SNP         | -0.03853                                    |
| rs896319    | 1   | 205205651 | G        | T        | 1              | proxy       | -0.06998                                    |
| rs6691170   | 1   | 222045446 | G        | T        | NA             | SNP         | 0.056924                                    |
| rs2078095   | 1   | 240408346 | A        | G        | NA             | SNP         | 0.042447                                    |
| rs7606562   | 2   | 48686695  | T        | A        | NA             | SNP         | -0.00419                                    |
| rs11885030  | 2   | 98755785  | G        | A        | 0.0479         | proxy       | 0.001765                                    |
| rs1446585   | 2   | 136407479 | A        | G        | NA             | SNP         | 0.039735                                    |
| rs842076    | 2   | 159818178 | C        | T        | 0.4158         | proxy       | -0.02816                                    |
| rs4668039   | 2   | 169025379 | A        | G        | 1              | proxy       | 0.038438                                    |
| rs1455352   | 2   | 199485958 | T        | C        | 0.2775         | proxy       | 0.032473                                    |
| rs4675253   | 2   | 199888532 | C        | G        | NA             | SNP         | 0.063099                                    |
| rs3731861   | 2   | 219191256 | T        | C        | NA             | SNP         | -0.06418                                    |
| rs35149869  | 3   | 37029108  | T        | T        | 1              | proxy       | 0.019592                                    |
| rs116080590 | 3   | 40955671  | C        | A        | 0.0424         | proxy       | 0.116445                                    |
| rs2001732   | 3   | 52880740  | C        | T        | NA             | SNP         | -0.07592                                    |
| rs2581817   | 3   | 53071797  | G        | C        | NA             | SNP         | -0.0528                                     |
| rs9826722   | 3   | 64316392  | T        | G        | 0.1531         | proxy       | 0.020901                                    |
| rs7623129   | 3   | 64624426  | C        | T        | 1              | proxy       | -0.03323                                    |
| rs67550176  | 3   | 66444330  | T        | C        | NA             | SNP         | 0.048444                                    |
| rs13086367  | 3   | 112903888 | A        | G        | NA             | SNP         | -0.05269                                    |
| rs138091542 | 3   | 112904785 | C        | T        | 0.1602         | proxy       | -0.07761                                    |
| rs12635946  | 3   | 112916918 | C        | T        | NA             | SNP         | -0.05528                                    |
| rs10049390  | 3   | 133701119 | G        | A        | NA             | SNP         | 0.05287                                     |
| rs113569514 | 3   | 133748789 | T        | C        | NA             | SNP         | -0.06663                                    |
| rs10936599  | 3   | 169492101 | C        | T        | NA             | SNP         | -0.05259                                    |
| rs34880024  | 4   | 94957435  | T        | C        | 0.6928         | proxy       | 0.043526                                    |

|             |   |           |   |   |        |       |          |
|-------------|---|-----------|---|---|--------|-------|----------|
| rs7663401   | 4 | 106128954 | C | T | 1      | proxy | 0.056482 |
| rs2388976   | 4 | 115502406 | G | A | 1      | proxy | 0.03638  |
| rs4835192   | 4 | 145738397 | A | T | 0.2095 | proxy | 0.046627 |
| rs12641861  | 4 | 151660362 | T | G | 0.7732 | proxy | 0.026339 |
| rs1426947   | 4 | 175420523 | T | C | NA     | SNP   | -0.03669 |
| rs77776598  | 5 | 1240998   | T | C | NA     | SNP   | 0.139631 |
| rs2735940   | 5 | 1296486   | A | G | NA     | SNP   | 0.086259 |
| rs55810369  | 5 | 40090784  | C | T | NA     | SNP   | -0.05252 |
| rs1445012   | 5 | 40282106  | G | C | NA     | SNP   | 0.094153 |
| rs3930345   | 5 | 82881255  | C | T | NA     | SNP   | -0.0487  |
| rs12659017  | 5 | 125988175 | G | A | NA     | SNP   | 0.002367 |
| rs647161    | 5 | 134499092 | C | A | NA     | SNP   | 0.041701 |
| rs2302274   | 5 | 149546426 | A | G | NA     | SNP   | 0.047889 |
| rs472959    | 5 | 172324558 | G | A | NA     | SNP   | 0.035336 |
| rs1294437   | 6 | 6749789   | C | T | NA     | SNP   | -0.03444 |
| rs41302867  | 6 | 7240876   | G | A | 0.4589 | proxy | -0.06979 |
| rs2070699   | 6 | 12292772  | G | T | NA     | SNP   | 0.054108 |
| rs209142    | 6 | 28862617  | G | C | NA     | SNP   | 0.037326 |
| rs1476570   | 6 | 29809860  | G | A | NA     | SNP   | -0.00267 |
| rs116353863 | 6 | 31010185  | T | C | NA     | SNP   | 0.164692 |
| rs2517448   | 6 | 31062667  | T | C | NA     | SNP   | 0.043293 |
| rs62401893  | 6 | 31317361  | G | A | NA     | SNP   | 0.104554 |
| rs2516452   | 6 | 31427095  | A | G | NA     | SNP   | -0.07378 |
| rs3830041   | 6 | 32191339  | C | T | NA     | SNP   | 0.007388 |
| rs112226346 | 6 | 32586732  | G | C | NA     | SNP   | 0.084463 |
| rs16878812  | 6 | 35569562  | A | G | NA     | SNP   | -0.08758 |
| rs9470361   | 6 | 36623379  | G | A | NA     | SNP   | 0.06533  |
| rs9471632   | 6 | 41680666  | T | C | 0.3003 | proxy | 0.013488 |
| rs9472532   | 6 | 45605345  | C | A | 0.9465 | proxy | 0.066799 |
| rs2208605   | 6 | 55572187  | T | C | 0.7163 | proxy | 0.042135 |
| rs62404966  | 6 | 55712124  | C | T | NA     | SNP   | -0.06557 |
| rs6912214   | 6 | 55721302  | T | C | NA     | SNP   | -0.04215 |
| rs6928864   | 6 | 105966894 | C | A | NA     | SNP   | -0.11653 |
| rs145997965 | 6 | 106482613 | T | C | NA     | SNP   | 0.189455 |
| rs6911915   | 6 | 117809031 | T | C | NA     | SNP   | 0.044014 |
| rs151127921 | 6 | 133993925 | C | T | NA     | SNP   | 0.159257 |
| rs1182197   | 7 | 2863289   | A | C | NA     | SNP   | -0.03785 |

|             |    |           |   |   |        |       |          |
|-------------|----|-----------|---|---|--------|-------|----------|
| rs7810512   | 7  | 45150331  | A | C | NA     | SNP   | -0.04833 |
| rs80077929  | 7  | 46094089  | C | T | NA     | SNP   | 0.060381 |
| rs4236382   | 7  | 46889411  | G | A | NA     | SNP   | 0.045892 |
| rs6948177   | 7  | 47510741  | A | G | NA     | SNP   | 0.06087  |
| rs12539962  | 7  | 73167259  | C | T | NA     | SNP   | -0.04617 |
| rs2527927   | 7  | 99477426  | G | A | NA     | SNP   | -0.04186 |
| rs157901    | 7  | 130618123 | C | T | 0.1643 | proxy | -0.03357 |
| rs59076710  | 8  | 23634311  | G | T | 0.3184 | proxy | -0.01797 |
| rs826732    | 8  | 59742639  | G | C | NA     | SNP   | 0.034161 |
| rs2450115   | 8  | 117624093 | T | C | NA     | SNP   | -0.07224 |
| rs16892766  | 8  | 117630683 | A | C | NA     | SNP   | 0.201008 |
| rs117904730 | 8  | 117682626 | T | C | 0.5864 | proxy | -0.09809 |
| rs6983267   | 8  | 128413305 | G | T | NA     | SNP   | -0.151   |
| rs7013278   | 8  | 128414892 | T | C | NA     | SNP   | -0.14629 |
| rs10110900  | 8  | 128571059 | G | A | 0.4538 | proxy | -0.02897 |
| rs7859362   | 9  | 22105927  | T | C | NA     | SNP   | -0.06085 |
| rs12001437  | 9  | 34074476  | T | C | 0.299  | proxy | 0.01656  |
| rs13288865  | 9  | 101682572 | T | G | 1      | proxy | -0.06488 |
| rs10978941  | 9  | 110373819 | C | T | NA     | SNP   | -0.0575  |
| rs10817106  | 9  | 113654654 | G | C | NA     | SNP   | 0.052647 |
| rs7038489   | 9  | 136682468 | C | T | NA     | SNP   | -0.0756  |
| rs11789898  | 9  | 136925663 | G | T | NA     | SNP   | 0.049837 |
| rs12217641  | 10 | 8663875   | C | T | NA     | SNP   | 0.008249 |
| rs11255841  | 10 | 8739580   | T | A | NA     | SNP   | -0.09871 |
| rs11007250  | 10 | 29098096  | C | G | 0.4246 | proxy | 0.043471 |
| rs1773860   | 10 | 29291556  | C | T | NA     | SNP   | 0.037151 |
| rs10821905  | 10 | 52646093  | G | A | NA     | SNP   | -0.06695 |
| rs704017    | 10 | 80819132  | A | G | NA     | SNP   | 0.086584 |
| rs1782645   | 10 | 81048611  | C | T | NA     | SNP   | 0.047229 |
| rs11595126  | 10 | 91428283  | G | A | 0.9331 | proxy | 0.042329 |
| rs6584283   | 10 | 101290301 | T | C | NA     | SNP   | 0.021914 |
| rs35564340  | 10 | 101344263 | G | A | NA     | SNP   | 0.094575 |
| rs4919687   | 10 | 104595248 | G | A | NA     | SNP   | -0.01828 |
| rs12241008  | 10 | 114280702 | T | C | NA     | SNP   | 0.09986  |
| rs11196201  | 10 | 114803307 | A | T | 0.6456 | proxy | 0.043121 |
| rs11042725  | 11 | 10325325  | C | A | 0.9569 | proxy | 0.0349   |
| rs174537    | 11 | 61552680  | G | T | NA     | SNP   | -0.05374 |

|             |    |           |   |   |        |       |          |
|-------------|----|-----------|---|---|--------|-------|----------|
| rs10751097  | 11 | 69938433  | A | G | NA     | SNP   | -0.04777 |
| rs11236187  | 11 | 74364566  | A | C | NA     | SNP   | 0.078194 |
| rs7946853   | 11 | 74409077  | T | C | NA     | SNP   | 0.02892  |
| rs117042741 | 11 | 74628743  | C | T | NA     | SNP   | -0.22612 |
| rs55864876  | 11 | 100717136 | G | A | NA     | SNP   | -0.06769 |
| rs2155065   | 11 | 101616011 | C | T | NA     | SNP   | -0.04081 |
| rs3087967   | 11 | 111156836 | T | C | NA     | SNP   | -0.12654 |
| rs497916    | 11 | 118758089 | C | T | NA     | SNP   | 0.037147 |
| rs10774214  | 12 | 4368352   | T | C | NA     | SNP   | -0.03247 |
| rs3217861   | 12 | 4399054   | C | T | 0.2761 | proxy | 0.056817 |
| rs3217874   | 12 | 4400808   | C | T | NA     | SNP   | 0.06869  |
| rs187299794 | 12 | 5941363   | C | T | 0.0503 | proxy | -0.05583 |
| rs4764488   | 12 | 6332910   | A | G | 0.0859 | proxy | -0.00888 |
| rs2730985   | 12 | 43130624  | A | G | NA     | SNP   | 0.044797 |
| rs11169572  | 12 | 51216890  | T | C | NA     | SNP   | 0.086013 |
| rs715948    | 12 | 57532982  | T | C | 0.6274 | proxy | 0.048498 |
| rs7297628   | 12 | 64404555  | T | C | NA     | SNP   | -0.03548 |
| rs11178634  | 12 | 71518329  | G | T | NA     | SNP   | -0.04564 |
| rs11108175  | 12 | 96050887  | A | G | NA     | SNP   | -0.04837 |
| rs653178    | 12 | 112007756 | C | T | NA     | SNP   | 0.075734 |
| rs9634162   | 12 | 115098094 | G | A | NA     | SNP   | 0.03684  |
| rs7300312   | 12 | 115890922 | T | C | NA     | SNP   | 0.065566 |
| rs7299936   | 12 | 115934000 | G | A | NA     | SNP   | 0.053016 |
| rs73208120  | 12 | 117747590 | T | G | NA     | SNP   | 0.054895 |
| rs116964464 | 13 | 27543193  | C | T | NA     | SNP   | 0.101886 |
| rs10161980  | 13 | 34093518  | C | G | NA     | SNP   | -0.05268 |
| rs9603116   | 13 | 37493701  | A | G | 0.4068 | proxy | -0.02748 |
| rs45597035  | 13 | 73649152  | A | G | NA     | SNP   | -0.06143 |
| rs78341008  | 13 | 73791554  | T | C | NA     | SNP   | 0.107452 |
| rs1886450   | 13 | 73986628  | A | G | NA     | SNP   | 0.032069 |
| rs79665926  | 13 | 78578231  | G | T | 0.8885 | proxy | -0.05245 |
| rs1078563   | 13 | 110352851 | G | C | NA     | SNP   | -0.04052 |
| rs4600332   | 13 | 111078872 | A | G | NA     | SNP   | 0.056484 |
| rs28611105  | 14 | 51359658  | T | G | NA     | SNP   | 0.050232 |
| rs1497077   | 14 | 52491655  | T | C | NA     | SNP   | 0.039419 |
| rs1951864   | 14 | 54369299  | G | A | NA     | SNP   | 0.040672 |
| rs35107139  | 14 | 54419106  | A | C | NA     | SNP   | 0.089335 |

|             |    |          |   |   |        |       |          |
|-------------|----|----------|---|---|--------|-------|----------|
| rs4901473   | 14 | 54445157 | G | A | NA     | SNP   | -0.06014 |
| rs17094983  | 14 | 59189361 | G | A | NA     | SNP   | -0.06365 |
| rs8020436   | 14 | 59208437 | G | A | NA     | SNP   | 0.060355 |
| rs61975764  | 14 | 93014929 | G | A | NA     | SNP   | -0.02575 |
| rs8014920   | 14 | 99785345 | G | A | 0.2356 | proxy | 0.030242 |
| rs1554865   | 15 | 32999806 | C | T | NA     | SNP   | -0.13772 |
| rs1919364   | 15 | 33009574 | C | G | NA     | SNP   | 0.074368 |
| rs17816465  | 15 | 33156386 | G | A | NA     | SNP   | 0.078246 |
| rs3809570   | 15 | 67000117 | C | A | NA     | SNP   | -0.05398 |
| rs28647290  | 15 | 67405582 | G | A | 0.2646 | proxy | 0.002968 |
| rs77148098  | 15 | 68075698 | G | A | NA     | SNP   | 0.059136 |
| rs78473344  | 15 | 72395312 | T | G | 0.0971 | proxy | 0.042147 |
| rs79973254  | 15 | 91191441 | T | A | 0.8514 | proxy | 0.075035 |
| rs4783565   | 16 | 68750190 | G | A | 0.9739 | proxy | -0.05073 |
| rs4556797   | 16 | 80037987 | A | G | 0.2378 | proxy | 0.036633 |
| rs76702092  | 16 | 86257480 | C | G | 0.1156 | proxy | -0.02489 |
| rs7200646   | 16 | 86335351 | C | T | 0.501  | proxy | -0.0421  |
| rs62042090  | 16 | 86703949 | C | T | NA     | SNP   | 0.05934  |
| rs142192012 | 17 | 594005   | C | T | 0.4972 | proxy | -0.0426  |
| rs4968127   | 17 | 809643   | G | A | NA     | SNP   | -0.05888 |
| rs1806551   | 17 | 831873   | T | C | 0.0552 | proxy | 0.005076 |
| rs9899841   | 17 | 10714548 | C | T | 0.3894 | proxy | 0.038615 |
| rs983318    | 17 | 70413253 | G | A | NA     | SNP   | 0.057813 |
| rs3088242   | 17 | 80939495 | T | A | 0.0612 | proxy | -0.0051  |
| rs112795617 | 18 | 3166445  | T | A | 0.0781 | proxy | 0.020757 |
| rs2337113   | 18 | 46452327 | A | G | NA     | SNP   | -0.16435 |
| rs3752231   | 19 | 1043638  | C | T | 0.0424 | proxy | -0.0188  |
| rs10409772  | 19 | 5840926  | C | A | NA     | SNP   | 0.077136 |
| rs66850493  | 19 | 16428747 | G | A | 0.889  | proxy | 0.08379  |
| rs28840750  | 19 | 33519927 | T | G | NA     | SNP   | -0.19119 |
| rs1800469   | 19 | 41860296 | A | G | NA     | SNP   | 0.053034 |
| rs12979278  | 19 | 49218602 | C | T | NA     | SNP   | 0.036353 |
| rs7253433   | 19 | 59041723 | G | A | 0.12   | proxy | 0.002448 |
| rs966816    | 20 | 6376481  | G | A | NA     | SNP   | -0.09793 |
| rs994308    | 20 | 6603622  | C | T | NA     | SNP   | -0.07663 |
| rs4140509   | 20 | 6679139  | C | T | 0.0562 | proxy | 0.003774 |
| rs235755    | 20 | 6767119  | G | C | 0.0619 | proxy | 0.006553 |

|            |    |          |   |   |        |       |          |
|------------|----|----------|---|---|--------|-------|----------|
| rs2423279  | 20 | 7812350  | T | C | NA     | SNP   | 0.065712 |
| rs55695988 | 20 | 33090447 | G | A | 0.073  | proxy | -0.00352 |
| rs6031256  | 20 | 42583617 | A | G | 0.0675 | proxy | -0.00486 |
| rs11482045 | 20 | 42714142 | C | C | 0.0338 | proxy | -0.00537 |
| rs6066825  | 20 | 47340117 | A | G | NA     | SNP   | -0.07561 |
| rs6012915  | 20 | 48986567 | C | T | NA     | SNP   | -0.06523 |
| rs6095946  | 20 | 49060191 | C | T | NA     | SNP   | -0.06491 |
| rs6091189  | 20 | 49256285 | C | T | NA     | SNP   | 0.059205 |
| rs6014965  | 20 | 55831203 | A | G | NA     | SNP   | -0.04661 |
| rs8121252  | 20 | 57476809 | T | C | 0.7985 | proxy | -0.00191 |
| rs1741640  | 20 | 60932414 | T | C | NA     | SNP   | 0.127997 |
| rs2738783  | 20 | 62308612 | T | G | NA     | SNP   | -0.06247 |
| rs8127251  | 21 | 47797626 | G | A | 0.1306 | proxy | -0.0218  |
| rs4616575  | 22 | 29406076 | T | G | NA     | SNP   | -0.04051 |
| rs4820371  | 22 | 39659088 | T | C | 0.4601 | proxy | 0.026811 |
| rs5759256  | 22 | 43680239 | T | C | 0.1582 | proxy | 0.003187 |
| rs20195    | 22 | 43857328 | C | T | 0.7549 | proxy | 0.000142 |
| rs9614460  | 22 | 45745229 | T | G | NA     | SNP   | 0.048501 |
| rs7410394  | 22 | 46455794 | A | G | 0.0936 | proxy | -0.01033 |

[Variants: 202 SNPs used for calculating wGRS; CHR: cell cycle genes homology region; Position: position on a chromosome where a particular SNP is located; ACGT is an acronym for the four types of bases found in a DNA molecule: adenine (A), cytosine (C), guanine (G), and thymine (T); Coefficient (beta) extracted from the meta-GWAS published beta values of 202 SNPs. wGRS is the number of risk alleles carried at each genetic variant SNP is summed, weighted by its effect size (beta coefficient).]

**Table S2:** wGRS<sub>137</sub>, wGRS<sub>163</sub>, wGRS<sub>202</sub> comparison

| Model    | Method     | Case | Control | $\lambda$ | Predictors            | Intercept | Coefficient | OR (95% CI)      | P-value  | R <sup>2</sup> | Brier | AIC      | BIC      | C-statistic         | Corrected C-statistic | HL (P-value) |
|----------|------------|------|---------|-----------|-----------------------|-----------|-------------|------------------|----------|----------------|-------|----------|----------|---------------------|-----------------------|--------------|
| Model A1 | LASSO      | 1686 | 963     | 0.025739  | wGRS137               |           | 0.7297      | 2.07 (1.68-2.56) | 1.10E-11 | 0.264          | 0.184 | 2917.531 | 2952.822 | 0.766 (0.747-0.785) | 0.764                 | 0.1612       |
|          |            |      |         |           | Age                   |           | 0.041       | 1.04 (1.03-1.05) | 3.08E-29 |                |       |          |          |                     |                       |              |
|          |            |      |         |           | Sex                   | -1.1731   | 0.366       | 1.44 (1.21-1.72) | 5.61E-05 |                |       |          |          |                     |                       |              |
|          |            |      |         |           | Change of bowel habit |           | -1.2387     | 0.29 (0.24-0.35) | 8.99E-39 |                |       |          |          |                     |                       |              |
|          |            |      |         |           | Abdominal pain        |           | -0.6802     | 0.51 (0.42-0.61) | 6.28E-12 |                |       |          |          |                     |                       |              |
| Model A2 | LASSO      | 1686 | 963     | 0.025739  | wGRS163               |           | 0.7532      | 2.12 (1.73-2.62) | 1.26E-12 | 0.266          | 0.183 | 2912.991 | 2948.282 | 0.766 (0.748-0.785) | 0.765                 | 0.06302      |
|          |            |      |         |           | Age                   |           | 0.0409      | 1.04 (1.03-1.05) | 3.89E-29 |                |       |          |          |                     |                       |              |
|          |            |      |         |           | Sex                   | -1.2633   | 0.3632      | 1.44 (1.20-1.72) | 6.50E-05 |                |       |          |          |                     |                       |              |
|          |            |      |         |           | Change of bowel habit |           | -1.2405     | 0.29 (0.24-0.35) | 8.14E-39 |                |       |          |          |                     |                       |              |
|          |            |      |         |           | Abdominal pain        |           | -0.6764     | 0.51 (0.42-0.62) | 8.63E-12 |                |       |          |          |                     |                       |              |
| Model A3 | LASSO      | 1686 | 963     | 0.025739  | wGRS202               |           | 0.7612      | 2.14 (1.74-2.64) | 5.31E-13 | 0.266          | 0.183 | 2911.234 | 2946.526 | 0.767 (0.748-0.786) | 0.765                 | 0.02385      |
|          |            |      |         |           | Age                   |           | 0.041       | 1.04 (1.03-1.05) | 3.53E-29 |                |       |          |          |                     |                       |              |
|          |            |      |         |           | Sex                   | -1.3030   | 0.3611      | 1.43 (1.20-1.72) | 7.19E-05 |                |       |          |          |                     |                       |              |
|          |            |      |         |           | Change of bowel habit |           | -1.2411     | 0.29 (0.24-0.35) | 8.06E-39 |                |       |          |          |                     |                       |              |
|          |            |      |         |           | Abdominal pain        |           | -0.6784     | 0.51 (0.42-0.62) | 7.65E-12 |                |       |          |          |                     |                       |              |
| Model B  | LASSO      | 1686 | 963     | 0.031003  | Age                   |           | 0.0401      | 1.04 (1.03-1.05) | 1.06E-28 | 0.244          | 0.188 | 2962.84  | 2992.25  | 0.754 (0.735-0.774) | 0.753                 | 0.7107       |
|          |            |      |         |           | Sex                   | -1.2124   | 0.369       | 1.45 (1.21-1.73) | 4.09E-05 |                |       |          |          |                     |                       |              |
|          |            |      |         |           | Change of bowel habit |           | -1.2411     | 0.29 (0.24-0.35) | 1.34E-39 |                |       |          |          |                     |                       |              |
|          |            |      |         |           | Abdominal pain        |           | -0.702      | 0.50 (0.41-0.60) | 7.77E-13 |                |       |          |          |                     |                       |              |
|          |            |      |         |           |                       |           |             |                  |          |                |       |          |          |                     |                       |              |
| Model C1 | full model | 1686 | 963     | NA        | wGRS137               |           | 0.7291      | 2.07 (1.68-2.56) | 1.37E-11 | 0.266          | 0.183 | 2921.385 | 2986.087 | 0.766 (0.748-0.785) | 0.763                 | 0.03683      |
|          |            |      |         |           | Age                   |           | 0.041       | 1.04 (1.03-1.05) | 2.27E-28 |                |       |          |          |                     |                       |              |
|          |            |      |         |           | Sex                   |           | 0.3682      | 1.45 (1.21-1.73) | 5.46E-05 |                |       |          |          |                     |                       |              |
|          |            |      |         |           | BMI                   |           | -0.0196     | 0.98 (0.96-1.00) | 0.017999 |                |       |          |          |                     |                       |              |
|          |            |      |         |           | Family history        | -0.6360   | -0.0083     | 0.99 (0.78-1.26) | 0.946053 |                |       |          |          |                     |                       |              |
|          |            |      |         |           | Change of bowel habit |           | -1.2596     | 0.28 (0.23-0.34) | 8.30E-37 |                |       |          |          |                     |                       |              |
|          |            |      |         |           | Rectal bleeding       |           | 0.0422      | 1.04 (0.86-1.27) | 0.670474 |                |       |          |          |                     |                       |              |
|          |            |      |         |           | Weight loss           |           | -0.0107     | 0.99 (0.78-1.26) | 0.930695 |                |       |          |          |                     |                       |              |
|          |            |      |         |           | Anaemia               |           | -0.0526     | 0.95 (0.74-1.22) | 0.681661 |                |       |          |          |                     |                       |              |
|          |            |      |         |           |                       |           |             |                  |          |                |       |          |          |                     |                       |              |

|          |            |      |     |    |                       |         |                  |                  |          |       |       |          |          |                     |       |  |          |  |  |
|----------|------------|------|-----|----|-----------------------|---------|------------------|------------------|----------|-------|-------|----------|----------|---------------------|-------|--|----------|--|--|
|          |            |      |     |    | Abdominal pain        | -0.6802 | 0.51 (0.42-0.62) | 1.31E-11         |          |       |       |          |          |                     |       |  |          |  |  |
|          |            |      |     |    | wGRS163               | 0.7517  | 2.12 (1.72-2.62) | 1.67E-12         |          |       |       |          |          |                     |       |  |          |  |  |
|          |            |      |     |    | Age                   | 0.041   | 1.04 (1.03-1.05) | 2.90E-28         |          |       |       |          |          |                     |       |  |          |  |  |
|          |            |      |     |    | Sex                   | 0.3653  | 1.44 (1.20-1.72) | 6.33E-05         |          |       |       |          |          |                     |       |  |          |  |  |
|          |            |      |     |    | BMI                   | -0.0193 | 0.98 (0.97-1.00) | 0.01946          |          |       |       |          |          |                     |       |  |          |  |  |
| Model C2 | full model | 1686 | 963 | NA | Family history        | -0.7315 | -0.0026          | 1.00 (0.78-1.27) | 0.983021 | 0.268 | 0.183 | 2916.983 | 2981.684 | 0.767 (0.748-0.786) | 0.763 |  | 0.007456 |  |  |
|          |            |      |     |    | Change of bowel habit |         | -1.2616          | 0.28 (0.23-0.34) | 7.45E-37 |       |       |          |          |                     |       |  |          |  |  |
|          |            |      |     |    | Rectal bleeding       |         | 0.0399           | 1.04 (0.86-1.27) | 0.688164 |       |       |          |          |                     |       |  |          |  |  |
|          |            |      |     |    | Weight loss           |         | -0.0084          | 0.99 (0.78-1.26) | 0.945661 |       |       |          |          |                     |       |  |          |  |  |
|          |            |      |     |    | Anaemia               |         | -0.0547          | 0.95 (0.74-1.22) | 0.669637 |       |       |          |          |                     |       |  |          |  |  |
|          |            |      |     |    | Abdominal pain        |         | -0.6771          | 0.51 (0.42-0.62) | 1.70E-11 |       |       |          |          |                     |       |  |          |  |  |
|          |            |      |     |    | wGRS202               |         | 0.7603           | 2.14 (1.74-2.64) | 6.91E-13 |       |       |          |          |                     |       |  |          |  |  |
|          |            |      |     |    | Age                   |         | 0.041            | 1.04 (1.03-1.05) | 2.65E-28 |       |       |          |          |                     |       |  |          |  |  |
|          |            |      |     |    | Sex                   |         | 0.3631           | 1.44 (1.20-1.72) | 7.05E-05 |       |       |          |          |                     |       |  |          |  |  |
|          |            |      |     |    | BMI                   |         | -0.0195          | 0.98 (0.96-1.00) | 0.018733 |       |       |          |          |                     |       |  |          |  |  |
| Model C3 | full model | 1686 | 963 | NA | Family history        | -0.7679 | -0.0024          | 1.00 (0.78-1.27) | 0.984612 | 0.269 | 0.183 | 2915.181 | 2979.883 | 0.767 (0.749-0.786) | 0.764 |  | 0.01758  |  |  |
|          |            |      |     |    | Change of bowel habit |         | -1.2616          | 0.28 (0.23-0.34) | 7.68E-37 |       |       |          |          |                     |       |  |          |  |  |
|          |            |      |     |    | Rectal bleeding       |         | 0.0402           | 1.04 (0.86-1.27) | 0.685827 |       |       |          |          |                     |       |  |          |  |  |
|          |            |      |     |    | Weight loss           |         | -0.0112          | 0.99 (0.78-1.26) | 0.927834 |       |       |          |          |                     |       |  |          |  |  |
|          |            |      |     |    | Anaemia               |         | -0.0531          | 0.95 (0.74-1.22) | 0.678512 |       |       |          |          |                     |       |  |          |  |  |
|          |            |      |     |    | Abdominal pain        |         | -0.6786          | 0.51 (0.42-0.63) | 1.55E-11 |       |       |          |          |                     |       |  |          |  |  |
|          |            |      |     |    | Age                   |         | 0.0404           | 1.04 (1.03-1.05) | 4.12E-28 |       |       |          |          |                     |       |  |          |  |  |
|          |            |      |     |    | Sex                   |         | 0.3714           | 1.45 (1.21-1.73) | 3.94E-05 |       |       |          |          |                     |       |  |          |  |  |
|          |            |      |     |    | BMI                   |         | -0.0191          | 0.98 (0.97-1.00) | 0.019995 |       |       |          |          |                     |       |  |          |  |  |
|          |            |      |     |    | Family history        |         | 0.0349           | 1.04 (0.82-1.32) | 0.773835 |       |       |          |          |                     |       |  |          |  |  |
| Model D  | full model | 1686 | 963 | NA | Change of bowel habit | -0.7170 | -1.2667          | 0.28 (0.23-0.34) | 7.07E-38 | 0.247 | 0.187 | 2966.24  | 3025.059 | 0.755 (0.736-0.775) | 0.752 |  | 0.4278   |  |  |
|          |            |      |     |    | Rectal bleeding       |         | 0.0734           | 1.08 (0.89-1.31) | 0.45527  |       |       |          |          |                     |       |  |          |  |  |
|          |            |      |     |    | Weight loss           |         | -0.0053          | 0.99 (0.78-1.27) | 0.965515 |       |       |          |          |                     |       |  |          |  |  |
|          |            |      |     |    | Anaemia               |         | -0.0661          | 0.94 (0.73-1.20) | 0.602107 |       |       |          |          |                     |       |  |          |  |  |
|          |            |      |     |    | Abdominal pain        |         | -0.6999          | 0.50 (0.41-0.60) | 2.03E-12 |       |       |          |          |                     |       |  |          |  |  |

**Table S3:** Risk prediction models for CRC in patients with symptoms

| Author, year    | Country         | Study design | Population                                                                                         | Outcome | Sample (development /validation) | size | Predictors                                                                                                                                                                         | Model performance (95%CI)                 | Model presentation | Internal validation |
|-----------------|-----------------|--------------|----------------------------------------------------------------------------------------------------|---------|----------------------------------|------|------------------------------------------------------------------------------------------------------------------------------------------------------------------------------------|-------------------------------------------|--------------------|---------------------|
| Fijten, 1995    | The Netherlands | D            | patients with overt rectal bleeding or a history of visible rectal blood loss in previous 3 months | CRC     | 269                              |      | age<br>change of bowel habit<br>rectal bleeding                                                                                                                                    | AUC: 0.97                                 | risk score         | NA                  |
| Adelstein, 2010 | Australia       | D            | patients >18 years scheduled for colonoscopy                                                       | CRC     | 8204                             |      | age<br>sex<br>rectal bleeding<br>abdominal pain<br>anaemia<br>mucous<br>history of diverticular disease<br>NSAID or aspirin use                                                    | AUC: 0.85                                 | risk score         | NA                  |
| Adelstein, 2011 | Australia       | D            | patients >18 years scheduled for colonoscopy                                                       | CRC     | 8204                             |      | age<br>sex<br>smoking<br>education level<br>rectal bleeding<br>anaemia<br>mucous<br>fatigue<br>history of diverticular disease<br>irritable bowel syndrome<br>NSAID or aspirin use | AUC: 0.83                                 | risk score         | NA                  |
| Hurst, 2007     | UK              | D            | patients >18 years referred to a colorectal clinic                                                 | CRC     | 300                              |      | age<br>sex<br>smoking<br>abdominal pain<br>weight loss<br>sMMP-9                                                                                                                   | sensitivity: 0.779;<br>specificity: 0.771 | formula            | NA                  |
| Lam, 2002       | China           | D            | patients attending surgical department for rectal bleeding                                         | CRC     | 194                              |      | age<br>rectal bleeding<br>mucous                                                                                                                                                   | sensitivity: 0.731;<br>specificity: 0.628 | risk score         | NA                  |

|                   |         |   |                                                                                        |     |       |                                                                                                                                                                                                     |                            |            |    |
|-------------------|---------|---|----------------------------------------------------------------------------------------|-----|-------|-----------------------------------------------------------------------------------------------------------------------------------------------------------------------------------------------------|----------------------------|------------|----|
| Mahadavan, 2011   | UK      | D | patients >40 years referred to a CRC surgical clinic                                   | CRC | 714   | age<br>sex<br>rectal bleeding<br>FOBT<br>mean red cell volume (fl)<br>carcino-embryonic antigen (µg/l)<br>DNA (µg/ml)                                                                               | AUC: 0.84 (0.78–0.90)      | risk score | NA |
| Hamilton, 2005    | UK      | D | patients >40 years from Exeter Primary Care Trust                                      | CRC | 2093  | rectal bleeding<br>diarrhoea<br>abdominal pain<br>weight loss<br>constipation<br>tenderness on palpation of abdomen<br>haemoglobin <13 g/dl<br>blood sugar >10 mmol/l<br>FOBT                       | positive predictive values | NA         | NA |
| Hamilton, 2009    | UK      | D | patients >30 years from Health Improvement Network (THIN)                              | CRC | 43791 | rectal bleeding<br>change in bowel habit<br>diarrhoea<br>abdominal pain<br>weight loss<br>constipation<br>haemoglobin (g/dl)<br>mean red cell volume (fl)                                           | positive predictive values | NA         | NA |
| Bjerregaard, 2007 | Denmark | D | outpatients aged >40 years with symptoms consistent with CRC                           | CRC | 2172  | age<br>sex<br>anaemia<br>weight loss<br>abdominal pain<br>rectal bleeding<br>rectal mucous<br>change in frequency of bowel movements<br>change in stool consistency<br>insufficient rectal emptying | NA                         | NA         | NA |
| Thompson, 2007    | UK      | D | patients with lower gastrointestinal symptoms referred to a surgical outpatient clinic | CRC | 8529  | age<br>change in bowel habit<br>rectal bleeding<br>perianal symptoms                                                                                                                                | ROC curve                  | NA         | NA |

|                     |        |      |                                                                                                   |     |                 |                                                                                                                                                                                       |                                                                                                                                                                 |            |              |
|---------------------|--------|------|---------------------------------------------------------------------------------------------------|-----|-----------------|---------------------------------------------------------------------------------------------------------------------------------------------------------------------------------------|-----------------------------------------------------------------------------------------------------------------------------------------------------------------|------------|--------------|
| Hippisley-Cox, 2012 | UK     | D+IV | 30–84 years patients registered with practices                                                    | CRC | 2351052/1236601 | age<br>alcohol<br>rectal bleeding<br>change in bowel habit<br>abdominal pain<br>weight loss<br>loss of appetite<br>haemoglobin (g/dl)<br>family history of gastrointestinal cancer    | female: AUC 0.89 (0.88-0.90)<br><br>male: AUC 0.91 (0.90-0.91)                                                                                                  | risk score | split sample |
| Li, 2018*           | China  | D+IV | community residents aged 60 to 74 years participated in screening program                         | CRC | 890235          | age<br>sex<br>education level<br>occupation<br>diarrhoea<br>constipation<br>colon mucus and bleeding<br>gallbladder disease<br>stressful life event<br>CRC family history<br>FIT      | AUC: 0.838 (0.817–0.860)<br><br>calibration (P=0.1549)                                                                                                          | risk score | bootstrap    |
| Alatise, 2018*      | Africa | D+IV | patients with rectal bleeding who underwent complete colonoscopy                                  | CRC | 217/145         | age<br>sex<br>BMI<br>change of bowel habit<br>alternating<br>constipation<br>diarrhoea<br>pellet-like stool<br>weight loss<br>rectal bleeding<br>internal hemorrhoids<br>diverticulum | AUC: 0.875                                                                                                                                                      | risk score | random split |
| Chen, 2021*         | China  | D+IV | residents participated in MJ Health Management Institution (MJ) for self-paying medical screening | CRC | 234044          | age<br>sex<br>smoking<br>drinking<br>physical activity<br>fruit and vegetables<br>BMI<br>family history<br>black colour stool<br>change of bowel habit<br>anaemia                     | total colon: AUC: 0.73 (0.71–0.74)<br><br>proximal colon: AUC: 0.74 (0.71–0.76)<br><br>distal colon: AUC: 0.73 (0.70–0.76)<br><br>rectum: AUC: 0.71 (0.69–0.73) | risk score | random split |

|                     |       |      |                                                                                                                                |     |            |                                                                                                                                                                                                                                   |                                                                                                                                                                             |            |              |
|---------------------|-------|------|--------------------------------------------------------------------------------------------------------------------------------|-----|------------|-----------------------------------------------------------------------------------------------------------------------------------------------------------------------------------------------------------------------------------|-----------------------------------------------------------------------------------------------------------------------------------------------------------------------------|------------|--------------|
| Chen, 2021*         | China | D+IV | residents participated in MJ Health Management Institution (MJ) for self-paying medical screening                              | CRC | 234044     | age<br>sex<br>smoking<br>drinking<br>physical activity<br>fruit and vegetables<br>BMI<br>family history<br>CEA<br>CRP<br>FIT<br>hypertension<br>diabetes<br>black colour stool<br>change of bowel habit<br>anaemia                | total colon: AUC:<br>0.83 (0.81–0.85)<br><br>proximal colon:<br>AUC: 0.83 (0.80–0.86)<br><br>distal colon: AUC:<br>0.86 (0.84–0.88)<br><br>rectum:<br>AUC: 0.80 (0.78–0.83) | risk score | random split |
| Selvachandran, 2002 | UK    | D+EV | patients with distal colonic symptoms, referred by general practitioners                                                       | CRC | 2268       | age<br>sex<br>family history<br>rectal bleeding<br>change in bowel habit<br>weight loss<br>abdominal pain<br>loss of appetite<br>tenesmus<br>urgency<br>incomplete emptying<br>perianal symptoms<br>tiredness                     | internal AUC:<br>0.859<br><br>external AUC:<br>0.789                                                                                                                        | risk score | NA           |
| Cubiella, 2016*     | Spain | D+EV | patients with gastrointestinal symptoms referred for colonoscopy from primary and secondary health care                        | CRC | 1572/1481  | age<br>sex<br>faecal haemoglobin<br>blood haemoglobin<br>carcinoembryonic antigen<br>acetylsalicylic acid treatment<br>previous colonoscopy<br>benign anorectal lesion<br>rectal bleeding<br>change in bowel habit<br>rectal mass | internal AUC: 0.92<br>(0.91-0.93)<br><br>external AUC: 0.92<br>(0.90-0.94)                                                                                                  | risk score | NA           |
| Marshall, 2011      | UK    | D+EV | cases were patients aged 30 years or older with a diagnosis of CRC, seven controls per case, matched for practice, sex and age | CRC | 43791/2093 | haemoglobin<br>MCV<br>rectal bleeding<br>change of bowel habit<br>diarrhoea<br>constipation<br>abdominal pain<br>weight loss                                                                                                      | internal AUC: 0.83<br>(0.82-0.84)<br><br>external AUC: 0.92<br>(0.91-0.94)                                                                                                  | risk score | NA           |

|               |    |         |                                                     |     |                                         |                                                                                                       |                                                                                                                                                      |            |    |
|---------------|----|---------|-----------------------------------------------------|-----|-----------------------------------------|-------------------------------------------------------------------------------------------------------|------------------------------------------------------------------------------------------------------------------------------------------------------|------------|----|
| Collins, 2012 | UK | D+IV+EV | patients (30–84-year-old) registered with practices | CRC | 2351052/<br>1236601(IV)/<br>2135540(EV) | age<br>family history<br>rectal bleeding<br>abdominal pain<br>appetite loss<br>weight loss<br>anaemia | internal AUC:<br>female-0.89 (0.88–<br>0.90); male-0.91<br>(0.90–0.91)<br><br>external AUC:<br>female-0.91 (0.90–<br>0.92); male-0.90<br>(0.89–0.91) | risk score | NA |
|---------------|----|---------|-----------------------------------------------------|-----|-----------------------------------------|-------------------------------------------------------------------------------------------------------|------------------------------------------------------------------------------------------------------------------------------------------------------|------------|----|

Abbreviations: study design: D: model development; D+IV: model development with internal validation; D+EV: model development with external validation; AUC: area under the curve; CEA: carcinoembryonic antigen; CRC: colorectal cancer

\*Five recently developed prediction models were additionally included.

**Table S4:** Comparison of CRC cases in SOCCS (n=1649) and LABSS (n=37)

|                       | LABSS (n=37)        | SOCCS (n=1649)      | Total (n=1686)      | p-value |
|-----------------------|---------------------|---------------------|---------------------|---------|
| wGRS <sub>202</sub> * | 0.10 (-0.10-0.31)   | 0.11 (-0.19-0.42)   | 0.11 (-0.19-0.42)   | 0.876   |
| Age*                  | 69.00 (59.00-77.00) | 68.01 (59.33-75.36) | 68.01 (59.32-75.36) | 0.476   |
| Sex                   |                     |                     |                     |         |
| Male                  | 18 (48.65%)         | 938 (56.88%)        | 956 (56.70%)        | 0.405   |
| Female                | 19 (51.35%)         | 711 (43.12%)        | 730 (43.30%)        |         |
| BMI*                  | 25.86 (22.99-30.24) | 26.11 (23.39-29.90) | 26.11 (23.39-29.91) | 0.925   |
| Family history        |                     |                     |                     |         |
| No                    | 34 (91.89%)         | 1384 (83.93%)       | 1418 (84.10%)       | 0.279   |
| Yes                   | 3 (8.11%)           | 265 (16.07%)        | 268 (15.90%)        |         |
| Symptoms              |                     |                     |                     |         |
| Change of bowel habit |                     |                     |                     |         |
| No                    | 14 (37.84%)         | 957 (58.04%)        | 971 (57.59%)        | 0.022   |
| Yes                   | 23 (62.12%)         | 692 (41.96%)        | 715 (42.41%)        |         |
| Rectal bleeding       |                     |                     |                     |         |
| No                    | 20 (54.05%)         | 1110 (67.31%)       | 1130 (67.02%)       | 0.129   |
| Yes                   | 17 (45.95%)         | 539 (32.69%)        | 556 (32.98%)        |         |
| Weight loss           |                     |                     |                     |         |
| No                    | 27 (72.97%)         | 1410 (85.51%)       | 1437 (85.23%)       | 0.059   |
| Yes                   | 10 (27.03%)         | 239 (14.49%)        | 249 (14.77%)        |         |
| Anaemia               |                     |                     |                     |         |
| No                    | 24 (64.86%)         | 1269 (76.96%)       | 1293 (76.69%)       | 0.128   |
| Yes                   | 13 (35.14%)         | 380 (23.04%)        | 393 (23.31%)        |         |
| Abdominal pain        |                     |                     |                     |         |
| No                    | 31 (83.78%)         | 1323 (80.23%)       | 1354 (80.31%)       | 0.743   |
| Yes                   | 6 (16.22%)          | 326 (19.77%)        | 332 (19.69%)        |         |

**Table S5:** Age-CRC restricted cubic splines

| Model       | R <sup>2</sup> | Adjusted R <sup>2</sup> | AIC      | BIC      |
|-------------|----------------|-------------------------|----------|----------|
| Age 3 knots | 0.0760         | 0.0753                  | 3438.831 | 3462.358 |
| Age 4 knots | 0.0760         | 0.0750                  | 3440.780 | 3470.189 |
| Age 5 knots | 0.0773         | 0.0759                  | 3439.182 | 3474.474 |
| Age linear  | 0.0760         | 0.0756                  | 3436.852 | 3454.498 |

**Table S6:** BMI-CRC restricted cubic splines

| Model       | R <sup>2</sup> | Adjusted R <sup>2</sup> | AIC      | BIC      |
|-------------|----------------|-------------------------|----------|----------|
| BMI 3 knots | 0.0026         | 0.0018                  | 3641.401 | 3664.929 |
| BMI 4 knots | 0.0027         | 0.0016                  | 3642.904 | 3672.313 |
| BMI 5 knots | 0.0028         | 0.0013                  | 3644.790 | 3680.082 |
| BMI linear  | 0.0022         | 0.0018                  | 3640.319 | 3657.965 |

**Table S7:** wGRS<sub>202</sub>-CRC restricted cubic splines

| Model        | R <sup>2</sup> | Adjusted R <sup>2</sup> | AIC      | BIC      |
|--------------|----------------|-------------------------|----------|----------|
| wGRS 3 knots | 0.0247         | 0.0239                  | 3581.987 | 3605.515 |
| wGRS 4 knots | 0.0247         | 0.0236                  | 3583.901 | 3613.311 |
| wGRS 5 knots | 0.0248         | 0.0233                  | 3585.729 | 3621.020 |
| wGRS linear  | 0.0244         | 0.0241                  | 3580.682 | 3598.328 |

**Table S8:** Model C and model E comparison

| Model   | Method     | Continuous variable approach | Case | Control | Predictors                                                                                                                                          | R <sup>2</sup> | Brier | AIC      | BIC      | C-statistic         | Corrected C-statistic | HL (P-value) |
|---------|------------|------------------------------|------|---------|-----------------------------------------------------------------------------------------------------------------------------------------------------|----------------|-------|----------|----------|---------------------|-----------------------|--------------|
| Model C | full model | linear                       | 1686 | 963     | wGRS <sub>202</sub><br>age<br>BMI<br>sex<br>family history<br>change of bowel habits<br>rectal bleeding<br>weight loss<br>anaemia<br>abdominal pain | 0.269          | 0.183 | 2915.181 | 2979.883 | 0.767 (0.749-0.786) | 0.764                 | 0.0176       |
| Model E | full model | restricted cubic splines     | 1686 | 963     | wGRS <sub>202</sub><br>age<br>BMI<br>sex<br>family history<br>change of bowel habits<br>rectal bleeding<br>weight loss<br>anaemia<br>abdominal pain | 0.276          | 0.182 | 2914.93  | 3032.569 | 0.771 (0.753-0.790) | 0.760                 | 0.0875       |

**Table S9:** Summary of models A-D formula

| Model   | Formula                                                                                                                                                                                                                                                                                                                                                                                                                                                   |
|---------|-----------------------------------------------------------------------------------------------------------------------------------------------------------------------------------------------------------------------------------------------------------------------------------------------------------------------------------------------------------------------------------------------------------------------------------------------------------|
| Model A | Model A = $-1.3030 + 0.7612 \cdot \text{wGRS} + 0.0410 \cdot \text{Age} + 0.3611 \cdot \text{Sex (M:1; F:0)} - 1.2411 \cdot \text{Change of bowel habit (Yes:1; No:0)} - 0.6784 \cdot \text{Abdominal pain (Yes:1; No:0)}$ .                                                                                                                                                                                                                              |
| Model B | Model B = $-1.2124 + 0.0401 \cdot \text{Age} + 0.3690 \cdot \text{Sex (M:1; F:0)} - 1.2411 \cdot \text{Change of bowel habit (Yes:1; No:0)} - 0.7020 \cdot \text{Abdominal pain (Yes:1; No:0)}$ .                                                                                                                                                                                                                                                         |
| Model C | Model C = $-0.7679 + 0.7603 \cdot \text{wGRS} + 0.0410 \cdot \text{Age} + 0.3631 \cdot \text{Sex (M:1; F:0)} - 0.0195 \cdot \text{BMI} - 0.0024 \cdot \text{Family history (Yes:1; No:0)} - 1.2616 \cdot \text{Change of bowel habit (Yes:1; No:0)} + 0.0402 \cdot \text{Rectal bleeding (Yes:1; No:0)} - 0.0112 \cdot \text{Weight loss (Yes:1; No:0)} - 0.0531 \cdot \text{Anaemia (Yes:1; No:0)} - 0.6786 \cdot \text{Abdominal pain (Yes:1; No:0)}$ . |
| Model D | Model D = $-0.7170 + 0.0404 \cdot \text{Age} + 0.3714 \cdot \text{Sex (M:1; F:0)} - 0.0191 \cdot \text{BMI} + 0.0349 \cdot \text{Family history (Yes:1; No:0)} - 1.2667 \cdot \text{Change of bowel habit (Yes:1; No:0)} + 0.0734 \cdot \text{Rectal bleeding (Yes:1; No:0)} - 0.0053 \cdot \text{Weight loss (Yes:1; No:0)} - 0.0661 \cdot \text{Anaemia (Yes:1; No:0)} - 0.6999 \cdot \text{Abdominal pain (Yes:1; No:0)}$ .                            |

**Table S10:** CRC risk prediction models that incorporated genetic predictors

| Author, year    | Study population     | Model design | Study design | Sample size                                                                                                                                   | Outcome | Type of genetic variants used | GRS computation                                                  | Non-genetic factors included in the model                                                                                                                                 | C-statistic of model without genetic predictors | C-statistic of genetic predictors-enhanced model                      | IDI; NRI |
|-----------------|----------------------|--------------|--------------|-----------------------------------------------------------------------------------------------------------------------------------------------|---------|-------------------------------|------------------------------------------------------------------|---------------------------------------------------------------------------------------------------------------------------------------------------------------------------|-------------------------------------------------|-----------------------------------------------------------------------|----------|
| Abe, 2017       | Japanese             | D+EV         | CC           | derivation: 558 cases/ 1116 controls<br><br>replication: 547 cases/ 547 controls                                                              | CRC     | 11 SNPs                       | unweighted GRS                                                   | NA                                                                                                                                                                        | NA                                              | derivation: 0.639<br><br>replication: 0.569                           | NA       |
| Balavarca, 2019 | German               | D            | CC           | 291 CRC cases/ 487 controls                                                                                                                   | CRC     | 39 SNPs                       | unweighted GRS<br><br>wGRS (weights derived from the same study) | age, sex, family history, smoking, alcohol, red meat, NSAIDs, previous colonoscopy and polyps history                                                                     | 0.584 (0.545-0.622)                             | unweighted GRS: 0.636 (0.599–0.672);<br><br>wGRS: 0.616 (0.579–0.654) | NA       |
| Chandler, 2018  | US                   | D            | cohort       | 23,294 study population/ 329 cases                                                                                                            | CRC     | 5 SNPs                        | unweighted GRS                                                   | NA                                                                                                                                                                        | NA                                              | NA                                                                    | NA       |
| Cho, 2019       | Korean               | D            | CC           | 632 cases/ 1295 controls                                                                                                                      | CRC     | 13 SNPs                       | unweighted GRS<br><br>wGRS (weights derived from the same study) | BMI, physical activity, diet, smoking, alcohol                                                                                                                            | NA                                              | NA                                                                    | NA       |
| deKort S, 2019  | Dutch                | D            | CC           | 1907 cases/ 2729 controls                                                                                                                     | CRC     | 18 SNPs                       | unweighted GRS                                                   | age, BMI, pant size, CRC first degree relative, smoking, physical activity, alcohol, meat, vegetables, fish, sweets, added sugar, saturated fats and fiber, total energy. | NA                                              | NA                                                                    | NA       |
| Dunlop, 2013    | European descendants | D+IV+EV (CV) | CC           | genotypes alone: 39,266; In combination with other factors: 11,324;<br><br>external validation case-control sets: 1563 Swedish cases and 1504 | CRC     | 10 SNPs                       | unweighted GRS                                                   | age, sex, family history                                                                                                                                                  | 0.57                                            | 0.59                                                                  | NA       |

|                       |                         |                        |    |                                                                                              |     |         |                                                                                                         |                                                                                                                                                                   |                                                            |                                                                                                                                               |                                                                                                                                         |
|-----------------------|-------------------------|------------------------|----|----------------------------------------------------------------------------------------------|-----|---------|---------------------------------------------------------------------------------------------------------|-------------------------------------------------------------------------------------------------------------------------------------------------------------------|------------------------------------------------------------|-----------------------------------------------------------------------------------------------------------------------------------------------|-----------------------------------------------------------------------------------------------------------------------------------------|
|                       |                         |                        |    | controls, 702<br>Finnish cases and<br>418 controls.                                          |     |         |                                                                                                         |                                                                                                                                                                   |                                                            |                                                                                                                                               |                                                                                                                                         |
| Hiraki,<br>2013       | European<br>descendants | D                      | CC | 10,061 cases/<br>12,768 controls                                                             | CRC | 4 SNPs  | unweighted<br>GRS                                                                                       | age, sex, smoking,<br>BMI, family history,<br>NSAIDs, alcohol,<br>dietary calcium,<br>folate and red meat,<br>sedentary status,<br>hormone replacement<br>therapy | NA                                                         | NA                                                                                                                                            | NA                                                                                                                                      |
| Hosono,<br>2016       | Japanese                | D+EV                   | CC | derivation: 558<br>cases/ 1116<br>controls<br><br>replication: 547<br>cases/ 547<br>controls | CRC | 6 SNPs  | unweighted<br>GRS                                                                                       | age, smoking,<br>alcohol, folate intake,<br>BMI, family history,<br>physical activity                                                                             | derivation: 0.701<br>replication: 0.523                    | derivation: GRS-<br>0.605; GRS+non-<br>genetic<br>predictors-0.717<br><br>replication: GRS-<br>0.639; GRS+non-<br>genetic<br>predictors-0.636 | NA                                                                                                                                      |
| HsuL,<br>2015         | European<br>descendants | D+IV+EV<br>(bootstrap) | CC | training: 5811<br>cases/ 6302<br>controls<br><br>validation: 866<br>cases/ 869<br>controls   | CRC | 27 SNPs | unweighted<br>GRS<br><br>wGRS (weights<br>derived from<br>the literature)                               | age, sex, family<br>history, history of<br>endoscopic<br>examinations                                                                                             | men: 0.51 (0.48-<br>0.53)<br><br>women: 0.52<br>(0.5-0.55) | men: 0.59 (0.54-<br>0.64)<br><br>women: 0.56<br>(0.51-0.61)                                                                                   | NA                                                                                                                                      |
| Huyghe,<br>2019       | European<br>descendants | D                      | CC | 1439 cases/ 720<br>controls                                                                  | CRC | 95 SNPs | wGRS (weights<br>derived from<br>the same study)                                                        | NA                                                                                                                                                                | NA                                                         | NA                                                                                                                                            | NA                                                                                                                                      |
| Ibáñez-<br>Sanz, 2017 | Spanish                 | D+IV<br>(CV)           | CC | 1336 cases/ 2744<br>controls                                                                 | CRC | 21 SNPs | unweighted<br>GRS<br><br>wGRS (weights<br>derived from<br>the literature<br>and from the<br>same study) | alcohol, BMI,<br>physical activity, red<br>meat and vegetables,<br>NSAIDs/aspirin,<br>family history                                                              | 0.61 (0.59-0.64)                                           | 0.63 (0.60-0.66)                                                                                                                              | NA                                                                                                                                      |
| Iwasaki,<br>2017      | Japanese                | D+IV<br>(CV)           | CC | 675 cases/ 675<br>controls                                                                   | CRC | 6 SNPs  | wGRS (weights<br>derived from<br>the same study)                                                        | age, BMI, alcohol,<br>smoking                                                                                                                                     | 0.60                                                       | 0.66                                                                                                                                          | IDI (0.0052; 95% CI:<br>0.0023– 0.0081)<br><br>continuous NRI (0.36;<br>95% CI: 0.0023–0.71),<br>and NRI (0.26; 95%<br>CI: 0.0039–0.43) |

|                |                            |                  |        |                                                                                  |     |                                                                |                                                                  |                                                                                                                                                                          |                                                             |                                                                                                                                   |                        |
|----------------|----------------------------|------------------|--------|----------------------------------------------------------------------------------|-----|----------------------------------------------------------------|------------------------------------------------------------------|--------------------------------------------------------------------------------------------------------------------------------------------------------------------------|-------------------------------------------------------------|-----------------------------------------------------------------------------------------------------------------------------------|------------------------|
| Jenkins, 2019  | North American; Australian | D                | CC     | 1181 cases/ 999 controls                                                         | CRC | 45 SNPs                                                        | wGRS (weights derived from the literature)                       | family history                                                                                                                                                           | NA                                                          | NA                                                                                                                                | NA                     |
| Jeon, 2018     | European descendants       | D+IV (bootstrap) | CC     | training: 4875 cases/ 5291 controls<br><br>validation: 4873 cases/ 5299 controls | CRC | 63 SNPs                                                        | wGRS (weights derived from the same study)                       | sex, BMI, education, type 2 diabetes, smoking, alcohol, NSAID/ aspirin use, regular use of postmenopausal hormones, dietary factors, total-energy, and physical activity | men: 0.60 (0.59–0.61);<br><br>women: 0.60 (0.59–0.61)       | men: 0.63 (0.62–0.64);<br><br>women: 0.62 (0.61–0.63)                                                                             | NA                     |
| Jo, 2012       | Korean                     | D+IV (bootstrap) | CC     | 187 cases/ 976 controls                                                          | CRC | 3 SNPs: men<br><br>5 SNPs: women                               | unweighted GRS<br><br>wGRS (weights derived from the same study) | family history, age                                                                                                                                                      | men: 0.692 (0.647–0.732);<br><br>women: 0.603 (0.569–0.637) | GRS: men: 0.720 (0.682–0.767);<br>women: 0.650 (0.615–0.680)<br><br>wGRS: men: 0.719 (0.677–0.761);<br>women: 0.646 (0.612–0.674) | NA                     |
| Jung, 2015     | Korean                     | D                | CC     | 173 cases/ 1514 controls                                                         | CRC | 7 SNPs                                                         | unweighted GRS<br><br>wGRS (weights derived from the same study) | age, sex, smoking, fasting serum glucose, family history                                                                                                                 | 0.73 (0.69–0.78)                                            | 0.74 (0.70–0.78)                                                                                                                  | NRI: 0.17 (–0.05–0.37) |
| Jung, 2019     | European descendants       | D+IV (bootstrap) | cohort | 6539 study population/ 472 cases                                                 | CRC | 54 SNPs                                                        | NA                                                               | age, % calories from saturated fatty acid                                                                                                                                | NA                                                          | NA                                                                                                                                | NA                     |
| Marshall, 2010 | North American             | D+IV (bootstrap) | CC     | training: 112 cases/ 120 controls<br><br>validation: 202 cases/ 208 controls     | CRC | 7 genes (ANXA3, CLEC4D, LMNB1, PRRG4, TNFAIP6, VNN1 and IL2RB) | NA                                                               | NA                                                                                                                                                                       | NA                                                          | training: 0.80 (0.74–0.85)<br><br>validation: 0.80 (0.76–0.84)                                                                    | NA                     |
| Prizment, 2013 | Caucasian                  | D                | cohort | 8657 study population/ 205 cases                                                 | CRC | 20 SNPs                                                        | wGRS (weights derived from the literature)                       | NA                                                                                                                                                                       | NA                                                          | NA                                                                                                                                | NA                     |

|                           |                      |      |        |                                                                                                                                                                                                                                                     |     |                                                                                                       |                                                  |                                                                                                                                                                                                                                                                                                                          |                                                                          |                                                                              |    |
|---------------------------|----------------------|------|--------|-----------------------------------------------------------------------------------------------------------------------------------------------------------------------------------------------------------------------------------------------------|-----|-------------------------------------------------------------------------------------------------------|--------------------------------------------------|--------------------------------------------------------------------------------------------------------------------------------------------------------------------------------------------------------------------------------------------------------------------------------------------------------------------------|--------------------------------------------------------------------------|------------------------------------------------------------------------------|----|
| Rodriguez-Broadbent, 2017 | European descendants | D    | CC     | 9254 cases/<br>18,386 controls                                                                                                                                                                                                                      | CRC | total<br>cholesterol<br>(n=38);<br><br>triglyceride<br>(n=14);<br><br>LDL (n=9);<br><br>HDL<br>(n=43) | NA                                               | NA                                                                                                                                                                                                                                                                                                                       | NA                                                                       | NA                                                                           | NA |
| Schmit, 2019              | European descendants | D+EV | CC     | Discovery stage:<br>36,948 cases and<br>30,864 controls;<br><br>Replication set:<br>12,952 cases and<br>48,383 controls;<br><br>Generalizability<br>in East Asians,<br>African Americans,<br>and Hispanics:<br>12,085 cases and<br>22,083 controls. | CRC | 76 SNPs                                                                                               | wGRS (weights<br>derived from<br>the same study) | NA                                                                                                                                                                                                                                                                                                                       | NA                                                                       | NA                                                                           | NA |
| Shi, 2019                 | Caucasian            | D    | CC     | 387 cases/ 13,427<br>controls                                                                                                                                                                                                                       | CRC | 30 SNPs                                                                                               | wGRS (weights<br>derived from<br>the literature) | NA                                                                                                                                                                                                                                                                                                                       | NA                                                                       | NA                                                                           | NA |
| Smith, 2018               | UK                   | D    | cohort | Taylor model:<br>361,543 (1623<br>cases);<br><br>Wells model:<br>286,877 (1294<br>cases)                                                                                                                                                            | CRC | 41 SNPs                                                                                               | wGRS (weights<br>derived from<br>the literature) | Taylor model: age-<br>specific CRC rates<br>and estimated<br>RR for different<br>degrees of FH of<br>CRC.<br><br>Wells model: age,<br>diabetes, multi-<br>vitamin usage, FH of<br>CRC, education,<br>BMI, alcohol use,<br>physical activity,<br>NSAIDs, red meat<br>intake, smoking and<br>estrogen use (women<br>only). | Taylor model:<br>0.67 (0.65–0.68);<br><br>Wells model:<br>0.68 (0.67–69) | Taylor<br>model:0.69<br>(0.67–0.70);<br><br>Wells model:<br>0.69 (0.65–0.68) | NA |

|              |                      |           |        |                                                                                                                                        |     |                                                                                             |                                                               |                                                        |                                                                                                                                                          |                                                                                                                                                                                                                                  |                                                                                                                                                                                                                             |
|--------------|----------------------|-----------|--------|----------------------------------------------------------------------------------------------------------------------------------------|-----|---------------------------------------------------------------------------------------------|---------------------------------------------------------------|--------------------------------------------------------|----------------------------------------------------------------------------------------------------------------------------------------------------------|----------------------------------------------------------------------------------------------------------------------------------------------------------------------------------------------------------------------------------|-----------------------------------------------------------------------------------------------------------------------------------------------------------------------------------------------------------------------------|
| Thrift, 2015 | European descendants | D         | CC     | 10,226 cases/<br>10,286 controls                                                                                                       | CRC | 696 SNPs                                                                                    | wGRS (weights derived from the literature)                    | NA                                                     | NA                                                                                                                                                       | NA                                                                                                                                                                                                                               | NA                                                                                                                                                                                                                          |
| Thrift, 2015 | European descendants | D         | CC     | 10,226 cases/<br>10,286 controls                                                                                                       | CRC | 77 SNPs: BMI<br><br>47 SNPs: waist-hip ratio                                                | wGRS (weights derived from the literature)                    | NA                                                     | NA                                                                                                                                                       | NA                                                                                                                                                                                                                               | NA                                                                                                                                                                                                                          |
| Wang, 2013   | Chinese              | D+IV (CV) | CC     | 218 cases/ 385 controls                                                                                                                | CRC | 16 SNPs: short model;<br><br>26 SNPs: full model                                            | NA                                                            | NA                                                     | NA                                                                                                                                                       | 16-SNPs: 0.724<br>26-SNPs: 0.734                                                                                                                                                                                                 | NA                                                                                                                                                                                                                          |
| Wang, 2018   | Chinese              | D         | cohort | 64 cases/ 9636 controls                                                                                                                | CRC | 9 SNPs                                                                                      | NA                                                            | AFP, CA19-9, CEA                                       | AFP level: 0.523 (0.456–0.591);<br>CA19-9 level: 0.524 (0.451– 0.597);<br>CEA level: 0.568 (0.492–0.645);<br>AFP, CA19–9, CEA level: 0.509 (0.439–0.579) | AFP level - genetic corrected: 0.524 (0.458–0.591);<br>CA19–genetic corrected level: 0.525 (0.452–0.597);<br>CEA level- genetic corrected 0.572 (0.495–0.649);<br>AFP, CA19–9, CEA level- genetic corrected: 0.564 (0.487–0.641) | NA                                                                                                                                                                                                                          |
| Weigl, 2018  | German               | D         | CC     | genotype: 294 advanced neoplasms, 249 non-advanced adenomas, 500 controls<br><br>replication: 462 controls, 140 advanced adenomas, 355 | CRC | 48 SNPs (replication analyses within the TCPS with a subset of 35 SNPs of the original GRS) | unweighted GRS;<br><br>wGRS (weights derived from literature) | age, sex, previous colonoscopy, physical activity, BMI | model adjusted for age and gender: 0.599;<br><br>model adjusted for age, gender, previous colonoscopy, physical activity: 0.607;                         | model adjusted for age and gender: 0.653;<br><br>model adjusted for age, gender, previous colonoscopy, physical activity: 0.658;                                                                                                 | NRI and IDI of model including GRS were respectively of 0.29 (0.14–0.43) and 0.04 (0.03–0.05) when the model was adjusted for age and gender; 0.30 (0.15–0.44) and 0.04 (0.03–0.05) when adjusted for age, gender, previous |

|             |         |           |    |                           |     |         |                                                                                          |                                                                                                      |                                                                                                                                                                                                                                                                                                                         |                                                                                     |                                                                                                                                                                                                                                                                                                                                                                                                                                                                                                                                                                                                                                                                                  |
|-------------|---------|-----------|----|---------------------------|-----|---------|------------------------------------------------------------------------------------------|------------------------------------------------------------------------------------------------------|-------------------------------------------------------------------------------------------------------------------------------------------------------------------------------------------------------------------------------------------------------------------------------------------------------------------------|-------------------------------------------------------------------------------------|----------------------------------------------------------------------------------------------------------------------------------------------------------------------------------------------------------------------------------------------------------------------------------------------------------------------------------------------------------------------------------------------------------------------------------------------------------------------------------------------------------------------------------------------------------------------------------------------------------------------------------------------------------------------------------|
|             |         |           |    | non-advanced adenomas     |     |         |                                                                                          |                                                                                                      | model adjusted for age, gender, previous colonoscopy, physical activity, BMI: 0.615                                                                                                                                                                                                                                     | model adjusted for age, gender, previous colonoscopy, physical activity, BMI: 0.665 | colonoscopy, physical activity and 0.29 (0.14–0.43) and 0.04 (0.03–0.05) when the model was adjusted for age, gender, previous colonoscopy, physical activity, BMI.                                                                                                                                                                                                                                                                                                                                                                                                                                                                                                              |
| Weigl, 2018 | German  | D         | CC | 2363 cases/ 2198 controls | CRC | 44 SNPs | unweighted GRS<br><br>wGRS (weights derived from the literature)                         | age, sex, education, previous colonoscopy, smoking, hormone replacement therapy, BMI, family history | NA                                                                                                                                                                                                                                                                                                                      | NA                                                                                  | NA                                                                                                                                                                                                                                                                                                                                                                                                                                                                                                                                                                                                                                                                               |
| Xin, 2018   | Chinese | D+IV (CV) | CC | 1316 cases/ 2229 controls | CRC | 14 SNPs | unweighted GRS<br><br>wGRS (weights derived from the literature and from the same study) | smoking                                                                                              | OR (95%CI) of: 2.70 (2.06–3.54) in the simple count GRS model, 2.74 (2.19–3.43) in the directed logistic regression GRS model, 2.56 (2.05– 3.20) in the odds ratio weighted GRS model, 2.90 (2.32–3.63) in the explained variance weighted GRS model, 2.51 (2.01–3.14) in the explained variance weighted OR GRS model. | NA                                                                                  | simple-count-GRS vs. logistic regression weighted OR-GRS showed an NRI of – 0.082 (– 0.159, – 0.007; p value: 0.033) and an IDI of – 0.002 (– 0.004, – 2.33E– 04; 0.028); the simple-count- GRS vs. explained variance weighted OR-GRS showed an NRI of 0.017 (– 0.055, 0.090; 0.638) and an IDI of 2.80E– 04 (– 0.001, 0.001; 0.567); logistic regression weighted-GRS vs. explained variance weighted OR-GRS showed an NRI – 0.077 (– 0.153, – 0.001; 0.046) and an IDI of – 5.54E– 04 (– 0.001, – 3.17E– 05; 0.038). In addition, a model including only smoking factors was with a model including smoking factors and simple count GRS (SC-GRS), with an increased AUC, NRI |

|             |         |           |    |                                                                                         |     |                                                                            |                                            |                                                                                                                                                |    |                                                                                                                                                                                              |                                                                                   |
|-------------|---------|-----------|----|-----------------------------------------------------------------------------------------|-----|----------------------------------------------------------------------------|--------------------------------------------|------------------------------------------------------------------------------------------------------------------------------------------------|----|----------------------------------------------------------------------------------------------------------------------------------------------------------------------------------------------|-----------------------------------------------------------------------------------|
|             |         |           |    |                                                                                         |     |                                                                            |                                            |                                                                                                                                                |    |                                                                                                                                                                                              | and IDI in combined model of 0.084, 0.317 (0.225, 0.408) and 0.031 (0.023, 0.039) |
| Xin, 2019   | Chinese | D+IV (CV) | CC | Chinese study: 2248 cases/ 3173 controls;<br><br>GECCO study: 4461 cases/ 4140 controls | CRC | Chinese study: 19 SNPs vs. 58 SNPs<br><br>GECCO study: 19 SNPs vs. 75 SNPs | wGRS (weights derived from the same study) | sex, age, first principal component                                                                                                            | NA | Chinese studies:19 SNPs model of 0.597 (0.581– 0.613), 58 SNPs model of 0.623 (0.604– 0.642);<br><br>GECCO study:19 SNPs model of 0.575 (0.563– 0.587), 58 SNPs model of 0.585 (0.573–0.597) | NA                                                                                |
| Yeh, 2007   | Chinese | D         | CC | 727 cases/ 736 controls                                                                 | CRC | 10 SNPs                                                                    | NA                                         | age, education, physical activity, coffee, cigarette consumption, alcohol, staple consumption, meat, vegetable/ fruit and fish/ shrimp intake. | NA | NA                                                                                                                                                                                           | NA                                                                                |
| Zhang, 2017 | Chinese | D         | CC | 369 cases/ 929 controls                                                                 | CRC | 4 SNPs                                                                     | NA                                         | age, BMI, physical activity, emotion status, mental stress, cholesterol, drinking and smoking, vegetables and seafood consumption              | NA | NA                                                                                                                                                                                           | NA                                                                                |

Table S10 reproduced from Sassano et al., 2022.

Abbreviations: study design: D: model development; D+IV: model development with internal validation; D+EV: model development with external validation; AUC: area under the curve; CC: case-control; CEA: carcinoembryonic antigen; CRC: colorectal cancer; CV: cross-validation; NA: non-applicable; TRS: traditional risk score

**Table S11:** Methods for variable selection in the development of the final prediction model

| Method               | Characteristics                                                                                                                                                                                                                                                                                                    | Strengths                                                                                                                                                                                                                                                                                                                                                                                                                                                                                                                                                                                                                                                   | Limitations                                                                                                                                                                                                                                                                                                                                                                                                                                                                                                                                                                              |
|----------------------|--------------------------------------------------------------------------------------------------------------------------------------------------------------------------------------------------------------------------------------------------------------------------------------------------------------------|-------------------------------------------------------------------------------------------------------------------------------------------------------------------------------------------------------------------------------------------------------------------------------------------------------------------------------------------------------------------------------------------------------------------------------------------------------------------------------------------------------------------------------------------------------------------------------------------------------------------------------------------------------------|------------------------------------------------------------------------------------------------------------------------------------------------------------------------------------------------------------------------------------------------------------------------------------------------------------------------------------------------------------------------------------------------------------------------------------------------------------------------------------------------------------------------------------------------------------------------------------------|
| Full model           | <p>All candidate variables are included in the final model.</p> <p>Candidate variables are determined by the authors based on clinical knowledge and previous literature.</p>                                                                                                                                      | <ul style="list-style-type: none"> <li>• Less vulnerable to model overfitting, selection bias, and dataset-specific problems.</li> <li>• Computationally simple.</li> <li>• The full model with a limited number of important predictors may have better performance.</li> </ul>                                                                                                                                                                                                                                                                                                                                                                            | <ul style="list-style-type: none"> <li>• Requires reliable prior knowledge about what variables are predictive.</li> <li>• It is not practical to include a large set of variables in a model. The full model may exceed the number of dimensions the dataset can reasonably support.</li> <li>• Including too many variables in a model may lead to a close fit to the data, and the relationship between variables and the predicted outcome that exists in the particular dataset, but not in the true population.</li> <li>• The full model is not always easy to define.</li> </ul> |
| LASSO (penalization) | <p>The less important predictors of the dataset are penalized by the lasso regression. Imposes a “penalty” to bias predictor coefficients toward zero for not being selected for the final model.</p> <p>The penalty is a function of the coefficient’s absolute magnitude and a weight, <math>\lambda</math>.</p> | <ul style="list-style-type: none"> <li>• Does not require reliable prior knowledge about what variables are predictive.</li> <li>• Useful to identify a small set of the most influential predictors in the dataset with many candidate variables.</li> <li>• Simplifies and automates the process of selecting predictors to those most influential to predictive accuracy.</li> <li>• If correctly weighted, can enhance prediction accuracy.</li> <li>• Produces a simple model with fewer predictors which is preferred over a complex model with many predictors. The simple model is easier to interpret, generalise, and use in practice.</li> </ul> | <ul style="list-style-type: none"> <li>• May exclude predictors that have moderate predictive power.</li> <li>• May include implausible predictors and omit the known predictors which are verified in the previous literature.</li> <li>• Individual predictors are difficult to interpret because the focus is on the best-combined prediction rather than the accuracy of the estimation and interpretation of the contribution of individual predictors.</li> <li>• Computationally intensive.</li> </ul>                                                                            |

**Table S12:** Random forest model F and model G comparison

| Model   | Method        | Training/Test | Case | Control | mtry | No.tree | Predictors                                                                                                                                          | OBB_error rate | C-statistic         | Sensitivity | Specificity | Positive predictive value | Negative predictive value |
|---------|---------------|---------------|------|---------|------|---------|-----------------------------------------------------------------------------------------------------------------------------------------------------|----------------|---------------------|-------------|-------------|---------------------------|---------------------------|
| Model F | random forest | training      | 1181 | 675     | 3    | 500     | wGRS <sub>202</sub><br>age<br>BMI<br>sex<br>family history<br>change of bowel habits<br>rectal bleeding<br>weight loss<br>anaemia<br>abdominal pain | 27.64%         | 0.986 (0.979-0.990) | 0.972       | 0.993       | 0.988                     | 0.984                     |
| Model F | random forest | test          | 505  | 288     | 3    | 500     | wGRS <sub>202</sub><br>age<br>BMI<br>sex<br>family history<br>change of bowel habits<br>rectal bleeding<br>weight loss<br>anaemia<br>abdominal pain | 27.64%         | 0.754 (0.723-0.784) | 0.569       | 0.859       | 0.698                     | 0.778                     |
| Model G | random forest | training      | 1181 | 675     | 3    | 500     | age<br>BMI<br>sex<br>family history<br>change of bowel habits<br>rectal bleeding<br>weight loss<br>anaemia<br>abdominal pain                        | 27.37%         | 0.903 (0.889-0.916) | 0.807       | 0.958       | 0.916                     | 0.897                     |
| Model G | random forest | test          | 505  | 288     | 3    | 500     | age<br>BMI<br>sex<br>family history<br>change of bowel habits<br>rectal bleeding<br>weight loss<br>anaemia<br>abdominal pain                        | 27.37%         | 0.740 (0.708-0.770) | 0.549       | 0.850       | 0.675                     | 0.767                     |

The random forest regression models were built on the training sets (70%) and validated in the test set (30%). OBB\_error rate: out-of-bag estimate (a method of measuring the prediction error of random forests, boosted decision trees).

**Figure S1:** Flow chart for  $wGRS_{137}$ ,  $wGRS_{163}$ ,  $wGRS_{202}$

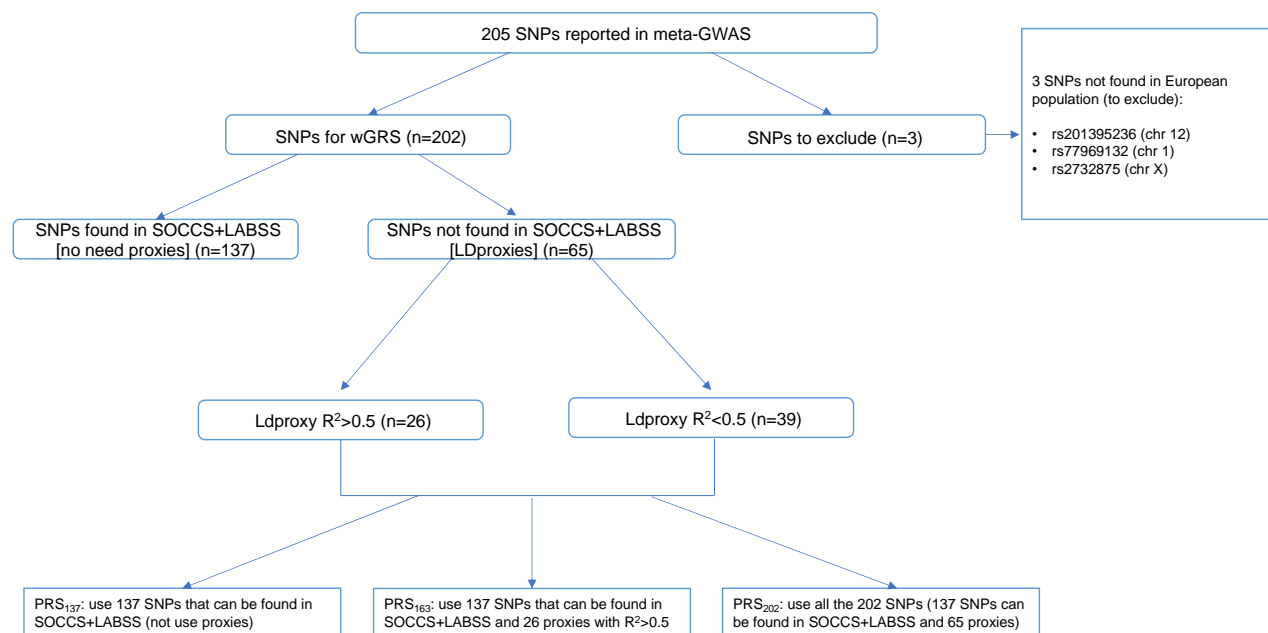

**Figure S2: TRIPOD checklist**

| Section/Topic                | Item | Checklist Item                                                                                                                                                                                            | Page |
|------------------------------|------|-----------------------------------------------------------------------------------------------------------------------------------------------------------------------------------------------------------|------|
| Title and abstract           |      |                                                                                                                                                                                                           |      |
| Title                        | 1    | D;V Identify the study as developing and/or validating a multivariable prediction model, the target population, and the outcome to be predicted                                                           |      |
| Abstract                     | 2    | D;V Provide a summary of objectives, study design, setting, participants, sample size, predictors, outcome, statistical analysis, results, and conclusions                                                |      |
| Introduction                 |      |                                                                                                                                                                                                           |      |
| Background and objectives    | 3a   | D;V Explain the medical context (including whether diagnostic or prognostic) and rationale for developing or validating the multivariable prediction model, including references to existing models       |      |
|                              | 3b   | D;V Specify the objectives, including whether the study describes the development or validation of the model or both                                                                                      |      |
| Methods                      |      |                                                                                                                                                                                                           |      |
| Source of data               | 4a   | D;V Describe the study design or source of data (eg, randomized trial, cohort, or registry data), separately for the development and validation data sets, if applicable                                  |      |
|                              | 4b   | D;V Specify the key study dates, including start of accrual; end of accrual; and if applicable, end of follow-up                                                                                          |      |
| Participants                 | 5a   | D;V Specify key elements of the study setting (eg, primary care, secondary care, general population) including number and location of centers                                                             |      |
|                              | 5b   | D;V Describe eligibility criteria for participants                                                                                                                                                        |      |
|                              | 5c   | D;V Give details of treatments received, if relevant                                                                                                                                                      |      |
| Outcome                      | 6a   | D;V Clearly define the outcome that is predicted by the prediction model, including how and when assessed                                                                                                 |      |
|                              | 6b   | D;V Report any actions to blind assessment of the outcome to be predicted                                                                                                                                 |      |
| Predictors                   | 7a   | D;V Clearly define all predictors used in developing the multivariable prediction model, including how and when they were measured                                                                        |      |
|                              | 7b   | D;V Report any actions to blind assessment of predictors for the outcome and other predictors                                                                                                             |      |
| Sample size                  | 8    | D;V Explain how the study size was arrived at                                                                                                                                                             |      |
| Missing data                 | 9    | D;V Describe how missing data were handled (eg, complete-case analysis, single imputation, multiple imputation) with details of any imputation method                                                     |      |
| Statistical analysis methods | 10a  | D Describe how predictors were handled in the analyses                                                                                                                                                    |      |
|                              | 10b  | D Specify type of model, all model-building procedures (including any predictor selection), and method for internal validation                                                                            |      |
|                              | 10c  | V For validation, describe how the predictions were calculated                                                                                                                                            |      |
|                              | 10d  | D;V Specify all measures used to assess model performance and, if relevant, to compare multiple models                                                                                                    |      |
|                              | 10e  | V Describe any model updating (eg, recalibration) arising from the validation, if done                                                                                                                    |      |
| Risk groups                  | 11   | D;V Provide details on how risk groups were created, if done                                                                                                                                              |      |
| Development vs. validation   | 12   | V For validation, identify any differences from the development data in setting, eligibility criteria, outcome, and predictors                                                                            |      |
| Results                      |      |                                                                                                                                                                                                           |      |
| Participants                 | 13a  | D;V Describe the flow of participants through the study, including the number of participants with and without the outcome and, if applicable, a summary of the follow-up time. A diagram may be helpful. |      |
|                              | 13b  | D;V Describe the characteristics of the participants (basic demographics, clinical features, available predictors), including the number of participants with missing data for predictors and outcome     |      |
|                              | 13c  | V For validation, show a comparison with the development data of the distribution of important variables (demographics, predictors, and outcome)                                                          |      |
| Model development            | 14a  | D Specify the number of participants and outcome events in each analysis                                                                                                                                  |      |
|                              | 14b  | D If done, report the unadjusted association between each candidate predictor and outcome                                                                                                                 |      |
| Model specification          | 15a  | D Present the full prediction model to allow predictions for individuals (ie, all regression coefficients, and model intercept or baseline survival at a given time point)                                |      |
|                              | 15b  | D Explain how to use the prediction model                                                                                                                                                                 |      |
| Model performance            | 16   | D;V Report performance measures (with CIs) for the prediction model                                                                                                                                       |      |
| Model updating               | 17   | V If done, report the results from any model updating (ie, model specification, model performance)                                                                                                        |      |
| Discussion                   |      |                                                                                                                                                                                                           |      |
| Limitations                  | 18   | D;V Discuss any limitations of the study (such as nonrepresentative sample, few events per predictor, missing data)                                                                                       |      |
| Interpretation               | 19a  | V For validation, discuss the results with reference to performance in the development data, and any other validation data                                                                                |      |
|                              | 19b  | D;V Give an overall interpretation of the results, considering objectives, limitations, results from similar studies, and other relevant evidence                                                         |      |
| Implications                 | 20   | D;V Discuss the potential clinical use of the model and implications for future research                                                                                                                  |      |
| Other information            |      |                                                                                                                                                                                                           |      |
| Supplementary information    | 21   | D;V Provide information about the availability of supplementary resources, such as study protocol, Web calculator, and data sets                                                                          |      |
| Funding                      | 22   | D;V Give the source of funding and the role of the funders for the present study                                                                                                                          |      |

\*Items relevant only to the development of a prediction model are denoted by D, items relating solely to a validation of a prediction model are denoted by V, and items relating to both are denoted D;V. We recommend using the TRIPOD Checklist in conjunction with the TRIPOD Explanation and Elaboration document.

(Source: adapted from <https://www.tripod-statement.org/> with permission covered by TRIPOD, open access). D: model development; V: model validation.

**Figure S3:** Plot-association between age and risk of CRC

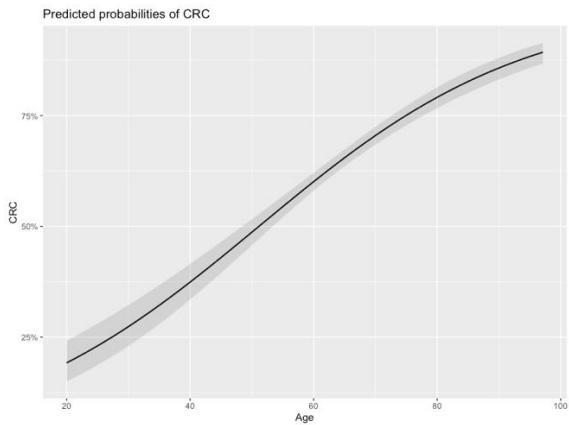

[Y-axis presents CRC probability rate. X-axis presents age. The black solid line represents the crude effect. The shaded regions show 95% CIs.]

**Figure S4:** Plot-association between BMI and risk of CRC

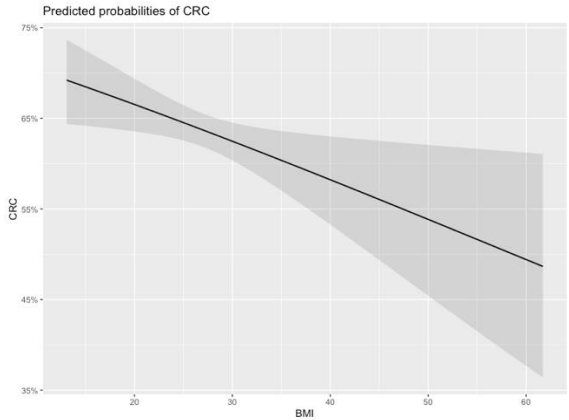

[Y-axis presents CRC probability rate. X-axis presents BMI. The black solid line represents the crude effect. The shaded regions show 95% CIs.]

**Figure S5:** Plot-association between  $wGRS_{202}$  and risk of CRC

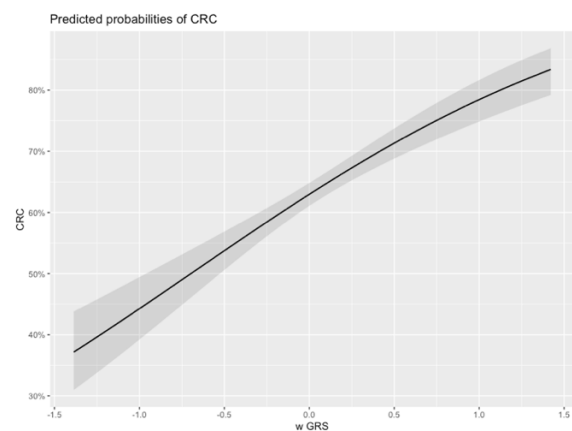

[Y-axis presents CRC probability rate. X-axis presents  $wGRS_{202}$ . The black solid line represents the crude effect. The shaded regions show 95% CIs.]

**Figure S6:** Restricted cubic splines fit age with CRC risk

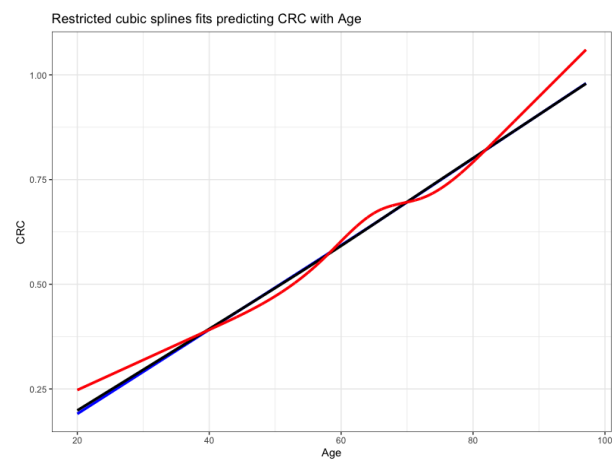

[Y-axis presents CRC probability rate. X-axis presents age. The blue solid line is restricted cubic splines using three knots. The black solid line is restricted cubic splines using four knots. The red solid line is restricted cubic splines using five knots.]

**Figure S7:** Restricted cubic splines fit BMI with CRC risk

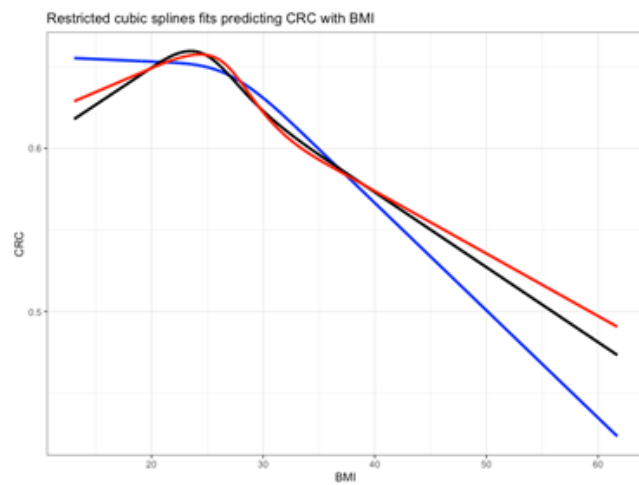

[Y-axis presents CRC probability rate. X-axis presents BMI. The blue solid line is restricted cubic splines using three knots. The black solid line is restricted cubic splines using four knots. The red solid line is restricted cubic splines using five knots.]

**Figure S8:** Restricted cubic splines fit wGRS<sub>202</sub> with CRC risk

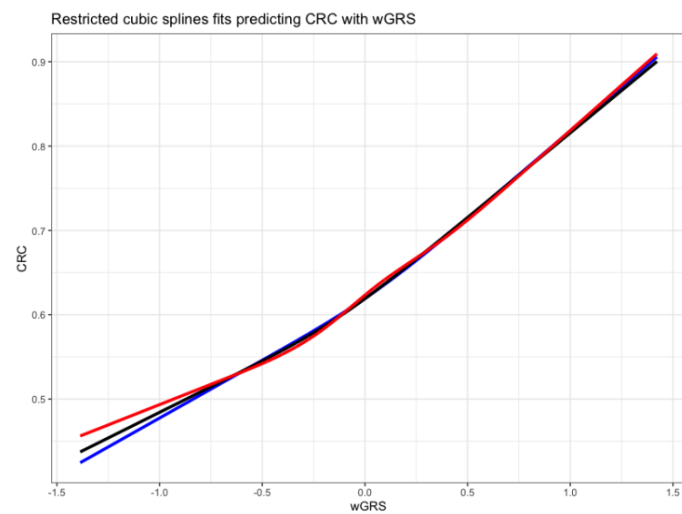

[Y-axis presents CRC probability rate. X-axis presents wGRS<sub>202</sub>. The blue solid line is restricted cubic splines using three knots. The black solid line is restricted cubic splines using four knots. The red solid line is restricted cubic splines using five knots.]

**Figure S9:** ROC curves- wGRS<sub>137</sub>, wGRS<sub>163</sub>, wGRS<sub>202</sub> comparison

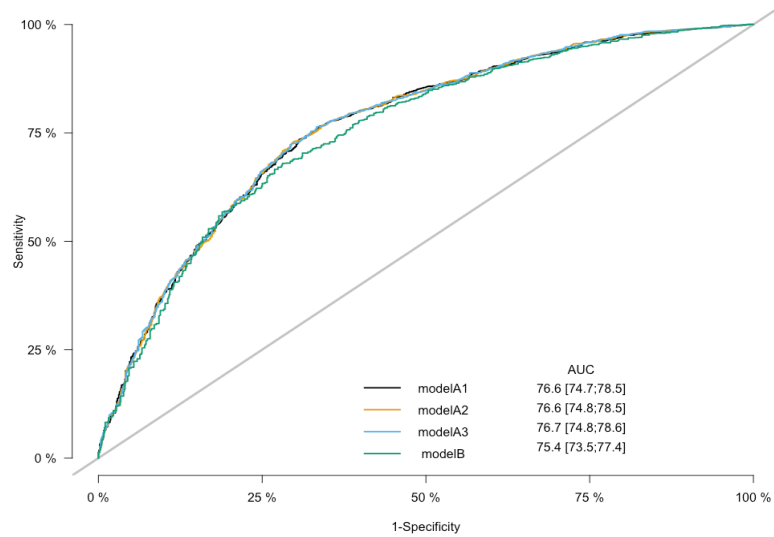

[LASSO model: model A1=wGRS<sub>137</sub>; model A2=wGRS<sub>163</sub>; model A3=wGRS<sub>202</sub>]

[model A1 vs A2: P=0.2744; model A1 vs A3: P=0.2061; model A2 vs A3: P=0.5580]

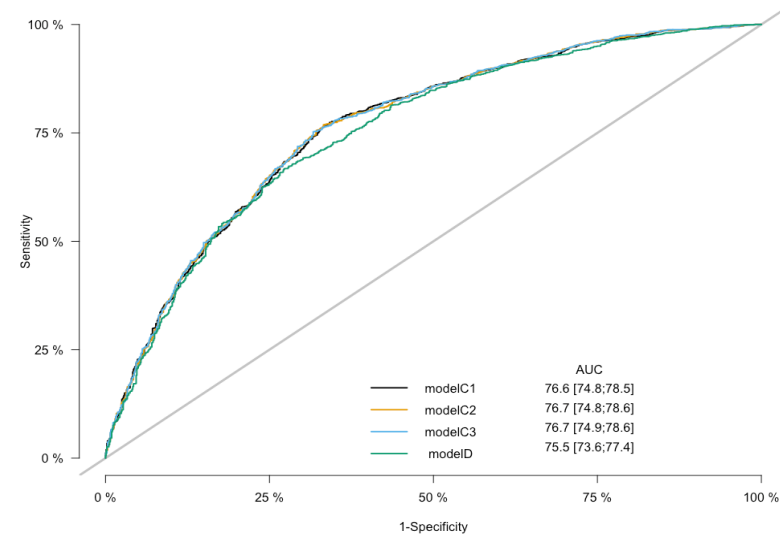

[Full model: model C1=wGRS<sub>137</sub>; model C2=wGRS<sub>163</sub>; model C3=wGRS<sub>202</sub>]

[model C1 vs C2: P=0.2344; model C1 vs C3: P=0.1664; model C2 vs C3: P=0.4496]

**Figure S10:** Calibration curves-  $wGRS_{137}$ ,  $wGRS_{163}$ ,  $wGRS_{202}$  comparison

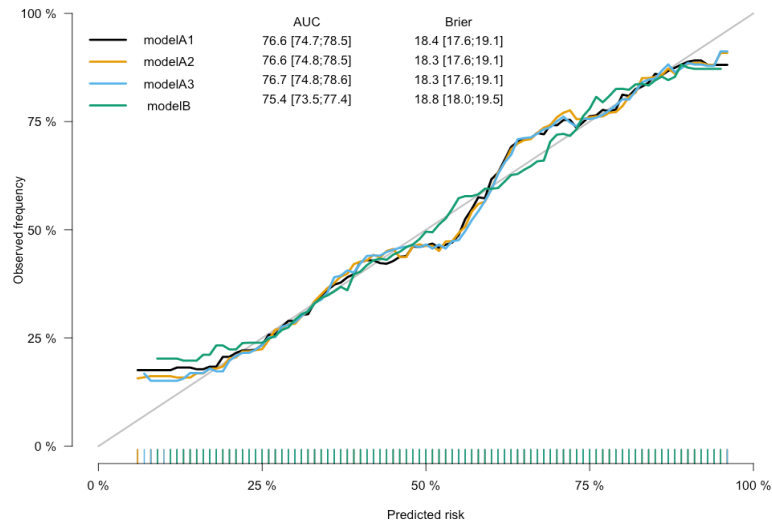

[LASSO model: model A1= $wGRS_{137}$ ; model A2= $wGRS_{163}$ ; model A3= $wGRS_{202}$ ]

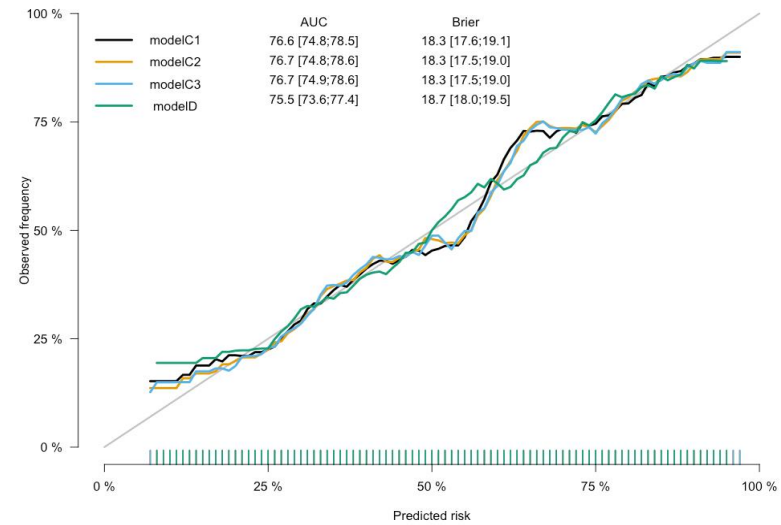

[Full model: model C1= $wGRS_{137}$ ; model C2= $wGRS_{163}$ ; model C3= $wGRS_{202}$ ]

**Figure S11:** Random forest parameters tuning: mtry versus OOB error

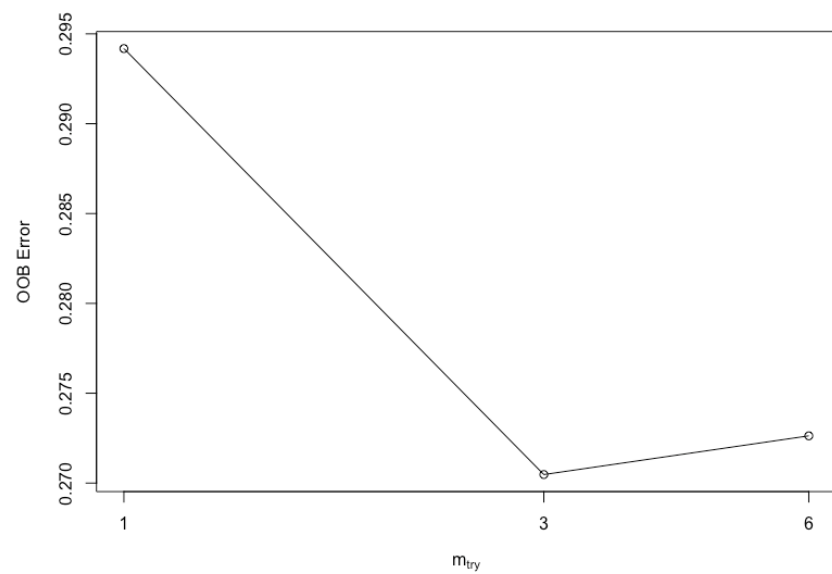

[a tree is grown mvariables (mtry) areselected at random from all nvariables ( $mtry \leq n$ ) and the best split of all mtry is used at each node. mtry=3, OOB error rate lowest=26.01%]

**Figure S12:** Model F\_ Plot of OOB errors against number of trees

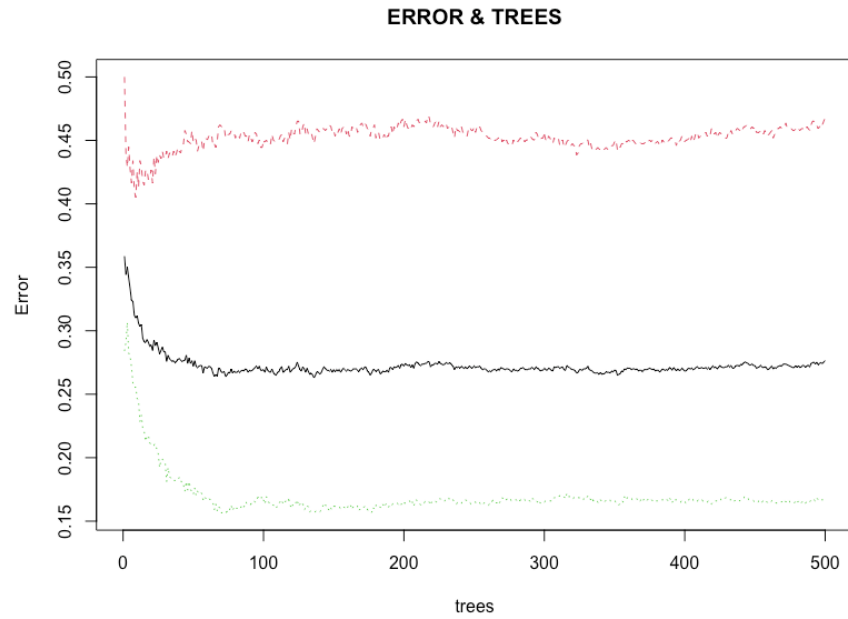

[black: overall relative error rates; red: control relative error rates; green: case relative error rates]

**Figure S13:** Model G\_ Plot of OOB errors against number of trees

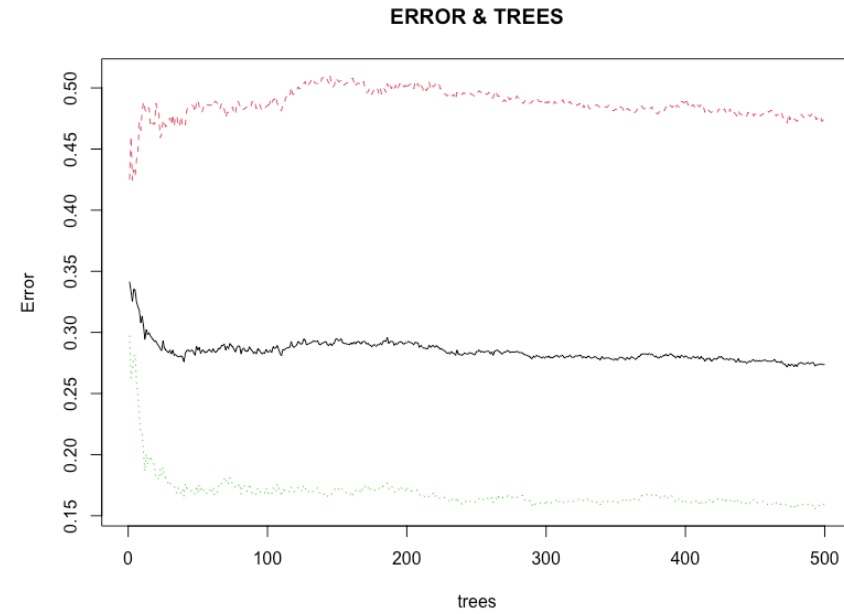

[black: overall relative error rates; red: control relative error rates; green: case relative error rates]
